1 **April 27, 2019:**

2 **Carbon monoxide dehydrogenases enhance**  
3 **bacterial survival by oxidising atmospheric CO**

4 **Paul R.F. Cordero<sup>1#</sup>, Katherine Bayly<sup>1#</sup>, Pok Man Leung<sup>1</sup>, Cheng Huang<sup>2</sup>, Zahra**  
5 **F. Islam<sup>1</sup>, Ralf B. Schittenhelm<sup>2</sup>, Gary M. King<sup>3</sup>, Chris Greening<sup>1\*</sup>**

6

7 <sup>1</sup> School of Biological Sciences, Monash University, Clayton, VIC 3800, Australia

8 <sup>2</sup> Monash Biomedical Proteomics Facility and Department of Biochemistry, Monash  
9 Biomedicine Discovery Institute, Monash University, Clayton, VIC 3800, Australia

10 <sup>3</sup> School of Biological Sciences, Louisiana State University, Baton Rouge, LA 70803,  
11 LA USA

12

13 # These authors contributed equally to this work.

14

15 \* Correspondence can be addressed to:

16

17 A/Prof Chris Greening (chris.greening@monash.edu), School of Biological Sciences,  
18 Monash University, Clayton, VIC 3800, Australia

## 19 **Abstract**

20 Carbon monoxide (CO) is a ubiquitous atmospheric trace gas produced by natural and  
21 anthropogenic sources. Some aerobic bacteria can oxidize atmospheric CO and,  
22 collectively, they account for the net loss of ~250 teragrams of CO from the  
23 atmosphere each year. However, the physiological role, genetic basis, and ecological  
24 distribution of this process remain incompletely resolved. In this work, we addressed  
25 these knowledge gaps through culture-based and culture-independent work. We  
26 confirmed through shotgun proteomic and transcriptional analysis that the genetically  
27 tractable aerobic soil actinobacterium *Mycobacterium smegmatis* upregulates  
28 expression of a carbon monoxide dehydrogenase by 50-fold when exhausted for  
29 organic carbon substrates. Whole-cell biochemical assays in wild-type and mutant  
30 backgrounds confirmed that this organism aerobically respire CO, including at sub-  
31 atmospheric concentrations, using the enzyme. Contrary to current paradigms on CO  
32 oxidation, the enzyme did not support chemolithoautotrophic growth and was  
33 dispensable for CO detoxification. However, it significantly enhanced long-term  
34 survival, suggesting that atmospheric CO serves a supplemental energy source during  
35 organic carbon starvation. Phylogenetic analysis indicated that atmospheric CO  
36 oxidation is widespread and an ancestral trait of CO dehydrogenases. Homologous  
37 enzymes are encoded by 685 sequenced species of bacteria and archaea, including  
38 from seven dominant soil phyla, and we confirmed genes encoding this enzyme are  
39 abundant and expressed in terrestrial and marine environments. On this basis, we  
40 propose a new survival-centric model for the evolution of CO oxidation and conclude  
41 that, like atmospheric H<sub>2</sub>, atmospheric CO is a major energy source supporting  
42 persistence of aerobic heterotrophic bacteria in deprived or changeable environments.

43

## 44 **Introduction**

45 Carbon monoxide (CO) is a chemically reactive trace gas that is produced through  
46 natural processes and anthropogenic pollution. The average global mixing ratio of this  
47 gas is approximately 90 ppbv in the troposphere (lower atmosphere), though this  
48 concentration greatly varies across time and space, with levels particularly high in  
49 urban areas [1–4]. Currently, human activity is responsible for approximately 60% of  
50 emissions, with the remainder attributable to natural processes [1]. Counteracting

51 these emissions, CO is rapidly removed from the atmosphere (lifetime of two months)  
52 by two major processes: geochemical oxidation by atmospheric hydroxyl radicals  
53 (85%) and biological oxidation by soil microorganisms (10%) [1, 5]. Soil  
54 microorganisms account for the net consumption of approximately 250 teragrams of  
55 atmospheric CO [1, 5, 6]; on a molar basis, this amount is seven times higher than the  
56 amount of methane consumed by soil bacteria [7]. Aerobic CO-oxidizing  
57 microorganisms are also abundant in the oceans; while oceans are a minor source of  
58 atmospheric CO overall [8, 9], this reflects that substantial amounts of the gas are  
59 produced photochemically within the water column and the majority is oxidized by  
60 marine bacteria before it is emitted to the atmosphere [10].

61 Aerobic CO-oxidizing microorganisms can be categorized into two major groups, the  
62 carboxydrotrophs and carboxydovores [11]. The better studied of the two groups,  
63 carboxydrotrophs grow chemolithoautotrophically with CO as the sole energy and  
64 carbon source when present at elevated concentrations. To date, this process has  
65 been reported in 11 bacterial genera from four classes (**Table S1**):  
66 Alphaproteobacteria [12–15], Gammaproteobacteria [12, 15–18], Actinobacteria [19–  
67 21], and Bacilli [22]. Genetic and biochemical studies on the model  
68 alphaproteobacterial carboxydrotroph *Oligotropha carboxidivorans* have demonstrated  
69 that form I carbon monoxide dehydrogenases mediate aerobic CO oxidation [23–25].  
70 The catalytic subunit of this heterotrimeric enzyme (CoxL) contains a molybdenum-  
71 copper center that specifically binds and hydroxylates CO [24, 25]. In such organisms,  
72 electrons derived from CO oxidation are relayed through both the aerobic respiratory  
73 chain to support ATP generation and the Calvin-Benson cycle to support CO<sub>2</sub> fixation  
74 [11, 26]. With some exceptions [19], these CO dehydrogenases have a high catalytic  
75 rate but exhibit low-affinity for their substrate ( $K_m > 400$  nM) [27]. Thus,  
76 carboxydrotrophs can grow in specific environments with elevated CO concentrations,  
77 but often cannot oxidize atmospheric CO [11, 28].

78 Carboxydovores are a broader group of bacteria and archaea adapted to oxidize CO  
79 at lower concentrations, including atmospheric levels, in a broad range of  
80 environments. These bacteria can oxidize CO but, in contrast to carboxydrotrophs,  
81 require organic carbon for growth [11, 29]. Carboxydovores have now been cultured  
82 from some 31 bacterial and archaeal genera to date (**Table S1**), spanning classes  
83 Alphaproteobacteria [29–32], Gammaproteobacteria [29, 33–36], Actinobacteria [18,

84 37–40], Bacilli [41], Thermomicrobia [41–44], Ktedonobacteria [44, 45], Deinococcota  
85 [41], Thermoprotei [46, 47], and Halobacteria [33, 48]. Carboxydovores are also  
86 thought to use form I CO dehydrogenases, but usually encode slower-acting, higher-  
87 affinity enzymes. In contrast to carboxydrotrophs, carboxydovores usually lack a  
88 complete Calvin-Benson cycle, suggesting they can support aerobic respiration, but  
89 not carbon fixation, using CO [11]. A related enzyme family (tentatively annotated as  
90 form II CO dehydrogenases) was also proposed to mediate CO oxidation in  
91 carboxydovores [11, 29, 49], but recent studies suggest CO is not their physiological  
92 substrate [32].

93 The physiological role of CO oxidation in carboxydovores has remained unclear. It was  
94 originally thought that such microorganisms oxidize CO primarily to support  
95 mixotrophic growth [29, 30], but a recent study focused on the alphaproteobacterial  
96 carboxydovore *Ruegeria pomeroyi* showed that CO neither stimulated growth nor  
97 influenced metabolite profiles [31]. We recently developed an alternative explanation:  
98 consumption of atmospheric CO enables carboxydovores to survive carbon limitation  
99 [44, 50, 51]. This hypothesis is inspired by studies showing atmospheric H<sub>2</sub> oxidation  
100 enhances survival [44, 52–57]. In support of this, CO dehydrogenases have been  
101 shown to be upregulated by five different bacteria during carbon limitation [38, 44, 53,  
102 58, 59] and atmospheric CO is consumed by stationary-phase cells [44, 60]. Moreover,  
103 ecological studies have shown that CO is rapidly oxidized in ecosystems containing  
104 low organic carbon [51, 61, 62]. However, in contrast to atmospheric H<sub>2</sub> [53–55, 57,  
105 63], it has not yet been genetically or biochemically proven that atmospheric CO  
106 supports survival. To address this, we studied CO oxidation in *Mycobacterium*  
107 *smegmatis*, a genetically tractable representative of a globally abundant soil  
108 actinobacterial genus [64, 65]. We show, through proteomic, genetic, and biochemical  
109 analyses, that a form I CO dehydrogenase is (i) strongly induced by organic carbon  
110 starvation, (ii) mediates aerobic respiration of atmospheric CO, and (iii) enhances  
111 survival of carbon-starved cells. On this basis, we confirm that atmospheric CO  
112 supports microbial survival and, with support from genomic, metagenomic, and  
113 metatranscriptomic analyses, propose a survival-centric model for the evolution and  
114 ecology of carboxydovores.

## 116 **Materials and Methods**

### 117 **Bacterial strains and growth conditions**

118 **Table S7** lists the bacterial strains and plasmids used in this study. *Mycobacterium*  
119 *smegmatis* mc<sup>2</sup>155 [66] and the derived strain  $\Delta$ *coxL* were maintained on lysogeny  
120 broth (LB) agar plates supplemented with 0.05% (w/v) Tween80. For broth culture, *M.*  
121 *smegmatis* was grown on Hartmans de Bont minimal medium [67] supplemented with  
122 0.05% (w/v) tyloxapol and 5.8 mM glycerol. *Escherichia coli* TOP10 cells were  
123 maintained on LB agar plates and grown in LB broth. Liquid cultures of both *M.*  
124 *smegmatis* and *E. coli* were incubated on a rotary shaker at 200 rpm, 37°C unless  
125 otherwise specified. Selective LB or LBT media used for cloning experiments  
126 contained gentamycin at 5  $\mu$ g mL<sup>-1</sup> for *M. smegmatis* and 20  $\mu$ g mL<sup>-1</sup> for *E. coli*.

### 127 **Mutant construction**

128 A markerless deletion of the *coxL* gene (MSMEG\_0746) was constructed by allelic  
129 exchange mutagenesis. Briefly, a 2245 bp fragment containing the fused left and right  
130 flanks of the MSMEG\_0746 gene was synthesized by GenScript. This fragment was  
131 cloned into the SpeI site of the mycobacterial shuttle plasmid pX33 [68] with *E. coli*  
132 TOP10 and transformed into *M. smegmatis* mc<sup>2</sup>155 electrocompetent cells. To allow  
133 for temperature-sensitive vector replication, the transformants were incubated on LBT-  
134 gentamycin agar at 28°C for five days until colonies were visible. Catechol-reactive  
135 colonies were sub-cultured on to LBT-gentamycin agar plates incubated at 40°C for  
136 three days to facilitate the first recombination of the *coxL* flanks into the chromosome.  
137 To allow the second recombination and removal of the backbone vector to occur,  
138 colonies that were gentamycin-resistant and catechol-reactive were sub-cultured in  
139 LBT-sucrose agar and incubated at 40°C for three days. The resultant colonies were  
140 screened by PCR to discriminate  $\Delta$ *coxL* mutants from wild-type revertants (**Figure S1**).  
141 Whole-genome sequencing (Peter Doherty Institute, University of Melbourne)  
142 confirmed *coxL* was deleted and no other SNPs were present in the  $\Delta$ *coxL* strain.  
143 **Table S8** lists the cloning and screening primers used in this study.

### 144 **Shotgun proteome analysis**

145 For shotgun proteome analysis, 500 mL cultures of *M. smegmatis* were grown in  
146 triplicate in 2.5 L aerated conical flasks. Cells were harvested at mid-exponential

147 phase ( $OD_{600} \sim 0.25$ ) and mid-stationary phase (72 hours post  $OD_{max} \sim 0.9$ ) by  
148 centrifugation ( $10,000 \times g$ , 10 min,  $4^{\circ}C$ ). They were subsequently washed in  
149 phosphate-buffered saline (PBS; 137 mM NaCl, 2.7 mM KCl, 10 mM  $Na_2HPO_4$  and 2  
150 mM  $KH_2PO_4$ , pH 7.4), recentrifuged, and resuspended in 8 mL lysis buffer (50 mM  
151 Tris-HCl, pH 8.0, 1 mM PMSF, 2 mM  $MgCl_2$ , 5 mg  $mL^{-1}$  lysozyme, 1 mg DNase). The  
152 resultant suspension was then lysed by passage through a Constant Systems cell  
153 disruptor (40,000 psi, four times), with unbroken cells removed by centrifugation  
154 ( $10,000 \times g$ , 20 min,  $4^{\circ}C$ ). To denature proteins, lysates were supplemented with 20%  
155 SDS to a final concentration of 4%, boiled at  $95^{\circ}C$  for 10 min, and sonicated in a  
156 Bioruptor (Diagenode) using 20 cycles of '30 seconds on' followed by '30 seconds off'.  
157 The lysates were clarified by centrifugation ( $14,000 \times g$ , 10 mins). Protein  
158 concentration was confirmed using the bicinchoninic acid assay kit (Thermo Fisher  
159 Scientific) and equal amounts of protein were processed from both exponential and  
160 stationary phase samples for downstream analyses. After removal of SDS by  
161 chloroform/methanol precipitation, the proteins were proteolytically digested with  
162 trypsin (Promega) and purified using OMIX C18 Mini-Bed tips (Agilent Technologies)  
163 prior to LC-MS/MS analysis. Using a Dionex UltiMate 3000 RSL Cnano system  
164 equipped with a Dionex UltiMate 3000 RS autosampler, the samples were loaded via  
165 an Acclaim PepMap 100 trap column ( $100 \mu m \times 2$  cm, nanoViper, C18,  $5 \mu m$ ,  $100 \text{ \AA}$ ;  
166 Thermo Scientific) onto an Acclaim PepMap RSLC analytical column ( $75 \mu m \times 50$  cm,  
167 nanoViper, C18,  $2 \mu m$ ,  $100 \text{ \AA}$ ; Thermo Scientific). The peptides were separated by  
168 increasing concentrations of buffer B (80% acetonitrile / 0.1% formic acid) for 158 min  
169 and analyzed with an Orbitrap Fusion Tribrid mass spectrometer (Thermo Scientific)  
170 operated in data-dependent acquisition mode using in-house, LFIQ-optimized  
171 parameters. Acquired .raw files were analyzed with MaxQuant [69] to globally identify  
172 and quantify proteins across the two conditions. Data visualization and statistical  
173 analyses were performed in Perseus [70].

#### 174 **Activity staining**

175 For CO dehydrogenase activity staining, 500 mL cultures of wild-type and  $\Delta coxL$  *M.*  
176 *smegmatis* were grown to mid-stationary phase (72 hours post  $OD_{max} \sim 0.9$ ) in 2.5 L  
177 aerated conical flasks. Cells were harvested by centrifugation, resuspended in lysis  
178 buffer, and lysed with a cell disruptor as described above. Following removal of  
179 unlysed cells by centrifugation ( $10,000 \times g$ , 20 min,  $4^{\circ}C$ ), the whole-cell lysates were

180 fractionated into cytosols and membranes by ultracentrifugation (150,000 × g). The  
181 protein concentration of the lysates, cytosols, and membranes was determined using  
182 the bicinchoninic acid assay [71] against bovine serum albumin standards. Next, 20  
183 µg protein from each fraction was loaded onto native Bis-Tris polyacrylamide gels (7.5%  
184 w/v running gel, 3.75% w/v stacking gel) prepared as described elsewhere [72] and  
185 run alongside a protein standard (NativeMark Unstained Protein Standard, Thermo  
186 Fisher Scientific) at 25 mA for 3 hr. For total protein staining, gels were incubated in  
187 AcquaStain Protein Gel Stain (Bulldog Bio) at 4°C for 3 hr. For CO dehydrogenase  
188 staining [14], gels were incubated in 50 mM Tris-HCl buffer containing 50 µM nitroblue  
189 tetrazolium chloride (NBT) and 100 µM phenazine methosulfate in an anaerobic jar  
190 (100% CO v/v atmosphere) at room temperature for 24 hours. Weak bands  
191 corresponding to CO dehydrogenase activity were also observed for wild-type  
192 fractions after 4 hours.

### 193 **Gas chromatography**

194 Gas chromatography was used to determine the kinetics and threshold of CO  
195 dehydrogenase activity of *M. smegmatis*. Briefly, 30 mL stationary-phase cultures of  
196 wild-type and  $\Delta\text{coxL}$  *M. smegmatis* strains were grown in 120 mL serum vials sealed  
197 with butyl rubber stoppers. At 72 hours post-OD<sub>max</sub>, cultures were reaerated (1 h),  
198 resealed, and amended with CO (*via* 1% v/v CO in N<sub>2</sub> gas cylinder, 99.999% pure) to  
199 achieve headspace concentrations of ~200 ppmv. Cultures were agitated (150 rpm)  
200 for the duration of the incubation period to enhance CO transfer to the cultures and  
201 maintain an aerobic environment. Headspace samples of 1 mL were periodically  
202 collected using a gas-tight syringe to measure CO. Gas concentrations in samples  
203 were measured by gas chromatography using a pulsed discharge helium ionization  
204 detector (model TGA-6791-W-4U-2, Valco Instruments Company Inc.) as previously  
205 described [44]. Concentrations of CO in each sample were regularly calibrated against  
206 ultra-pure CO gas standards of known concentrations to the limit of detection of 9 ppbv  
207 CO. Kinetic analysis was performed as described, except cultures were amended with  
208 six different starting concentrations of CO (4000, 2000, 1000, 500, 200, 50 ppmv) and  
209 oxidation was measured at up to five timepoints (0, 2, 4, 6, 8 h). Reaction velocity  
210 relative to the gas concentration was calculated at each timepoint and plotted on a  
211 Michaelis-Menten curve.  $V_{\text{max app}}$  and  $K_{\text{m app}}$  values were derived through a non-linear

212 regression model (GraphPad Prism, Michaelis-Menten, least squares fit) and linear  
213 regressions based on Lineweaver-Burk, Eadie-Hofstee, and Hanes-Woolf plots.

#### 214 **Respirometry measurements**

215 For respirometry measurements, 30 mL cultures of wild-type and  $\Delta\text{coxL}$  *M. smegmatis*  
216 were grown to mid-stationary phase (72 hours post  $\text{OD}_{\text{max}} \sim 0.9$ ) in 125 mL aerated  
217 conical flasks. Rates of  $\text{O}_2$  consumption were measured before and after CO addition  
218 using a Unisense  $\text{O}_2$  microsensor. Prior to measurement, the electrode was polarized  
219 at -800 mV for 1 hour with a Unisense multimeter and calibrated with  $\text{O}_2$  standards of  
220 known concentration. Gas-saturated PBS was prepared by bubbling PBS with 100%  
221 (v/v) of either  $\text{O}_2$  or CO for 5 min. Initially,  $\text{O}_2$  consumption was measured in 1.1 mL  
222 microrespiration assay chambers sequentially amended with *M. smegmatis* cell  
223 suspensions (0.9 mL) and  $\text{O}_2$ -saturated PBS (0.1 mL) that were stirred at 250 rpm at  
224 room temperature. After initial measurements, 0.1 mL of CO-saturated PBS was  
225 added into the assay mixture. Changes in  $\text{O}_2$  concentrations were recorded using  
226 Unisense Logger Software (Unisense, Denmark). Upon observing a linear change in  
227  $\text{O}_2$  concentration, rates of consumption were calculated over a period of 20 s and  
228 normalized against total protein concentration.

#### 229 **Gene expression analysis**

230 To assess CO dehydrogenase gene expression by qRT-PCR, synchronized 30 mL  
231 cultures of *M. smegmatis* were grown in triplicate in either 125 mL aerated conical  
232 flasks or 120 mL sealed serum vials supplemented with 1% (w/v) CO. Cultures were  
233 quenched at mid-exponential phase ( $\text{OD}_{600} \sim 0.25$ ) or mid-stationary phase (three days  
234 post- $\text{OD}_{\text{max}} \sim 0.9$ ) with 60 mL cold 3:2 glycerol:saline solution ( $-20^\circ\text{C}$ ). They were  
235 subsequently harvested by centrifugation ( $20,000 \times g$ , 30 minutes,  $-9^\circ\text{C}$ ), resuspended  
236 in 1 mL cold 1:1 glycerol:saline solution ( $-20^\circ\text{C}$ ), and further centrifuged ( $20,000 \times g$ ,  
237 30 minutes,  $-9^\circ\text{C}$ ). For cell lysis, pellets were resuspended in 1 mL TRIzol Reagent,  
238 mixed with 0.1 mm zircon beads, and subjected to five cycles of bead-beating (4,000  
239 rpm, 30 seconds) in a Biospec Mini-Beadbeater. Total RNA was subsequently  
240 extracted by phenol-chloroform extraction as per manufacturer's instructions (TRIzol  
241 Reagent User Guide, Thermo Fisher Scientific) and resuspended in  
242 diethylpyrocarbonate (DEPC)-treated water. RNA was treated with DNase using the  
243 TURBO DNA-free kit (Thermo Fisher Scientific) as per the manufacturer's instruction.



244 RNA concentration, purity, and integrity were confirmed by using a NanoDrop ND-  
245 1000 spectrophotometer and running extracts on a 1.2% agarose gel. cDNA was then  
246 synthesized using SuperScript III First-Strand Synthesis System for qRT-PCR  
247 (Thermo Fisher Scientific) with random hexamer primers as per the manufacturer's  
248 instructions. qPCR was used to quantify the copy numbers of the target gene *coxL*  
249 and housekeeping gene *sigA* against amplicon standards of known concentration. A  
250 standard curve was created based on the cycle threshold (Ct) values of *coxL* and *sigA*  
251 amplicons that were serially diluted from  $10^8$  to 10 copies ( $R^2 > 0.99$ ). The copy  
252 number of the genes in each sample was interpolated based on each standard curve  
253 and values were normalized to *sigA* expression in exponential phase in ambient air.  
254 For each biological replicate, all samples, standards, and negative controls were run  
255 in technical duplicate. All reactions were run in a single 96-well plate using the  
256 PowerUp SYBR Green Master Mix (Thermo Fisher Scientific) and LightCycler 480  
257 Instrument (Roche) according to each manufacturers' instructions.

## 258 **Growth and survival assays**

259 For growth and survival assays, cultures were grown in 30 mL media in either 125 mL  
260 aerated conical flasks or 120 mL sealed serum vials containing an ambient air  
261 headspace amended with 20% (v/v) CO. Growth was monitored by measuring optical  
262 density at 600 nm (1 cm cuvettes; Eppendorf BioSpectrometer Basic); when  $OD_{600}$   
263 was above 0.5, cultures were diluted ten-fold in before measurement. All growth  
264 experiments were performed using three biological replicates. To count colony forming  
265 units (CFU  $mL^{-1}$ ), each culture was serially diluted in HdB (no carbon source) and  
266 spotted on to agar plates in technical quadruplicates. Survival experiments were  
267 performed on two separate occasions using three biological replicates in the first  
268 experiment and six biological replicates in the second experiment. Percentage survival  
269 was calculated for each replicate by dividing the CFU  $mL^{-1}$  at each timepoint with the  
270 CFU  $mL^{-1}$  count at  $OD_{max}$ .

## 271 **Glycerol quantification**

272 Glycerol concentration in media was measured colorimetrically. Samples of 900  $\mu L$   
273 were taken periodically from triplicate cultures during growth, cells were pelleted  
274 (9,500 x *g*, 2 minutes) and supernatant was collected and stored at  $-20^{\circ}C$ . Glycerol  
275 content for all supernatant samples was measured simultaneously in a single 96-well

276 plate using a Glycerol Assay Kit (Sigma-Aldrich) as per manufacturer's instructions.  
277 Absorbance was measured at 570 nm using an Epoch 2 microplate reader (BioTek).  
278 A standard curve was constructed using four standards of glycerol (0 mM, 0.3 mM, 0.6  
279 mM and 1 mM;  $R^2 > 0.99$ ). Glycerol concentration was interpolated from this curve.  
280 Samples were diluted either five-fold or two-fold in UltraPure water such that they fell  
281 within the curve. All samples, standards and blanks were run in technical duplicate.

## 282 **Genome survey**

283 The amino acid sequences of the catalytic subunits of all putative form I CO  
284 dehydrogenases (CoxL) represented in the National Center for Biotechnology  
285 Information (NCBI) Reference Sequence (RefSeq) [73]. All sequences with greater  
286 than 55% sequence identity and 90% query coverage to CoxL sequences of  
287 *Oligotropha carboxidovorans* (WP\_013913730.1), *Mycobacterium smegmatis*  
288 (WP\_003892166.1), and *Natronorubrum bangense* (WP\_006067999.1) were  
289 retrieved by protein BLAST [74]. Homologous sequences with less than 55%  
290 sequence encoded form II CO dehydrogenases and hence were not retrieved. The  
291 dataset was manually curated to dereplicate sequences within species and remove  
292 incomplete sequences. The final dataset contained a total of 709 CoxL sequences  
293 across 685 different bacterial and archaeal species (**Table S3**).

## 294 **Phylogenetic analysis**

295 To construct phylogenetic trees, the retrieved sequences were aligned using ClustalW  
296 in MEGA7 [75]. Initially, the phylogenetic relationships of 709 sequences were  
297 visualized on a neighbor-joining tree based on the Poisson correction method and  
298 bootstrapped with 500 replicates. Subsequently, the phylogenetic relationships of a  
299 representative subset of 94 sequences were visualized on a maximum-likelihood tree  
300 based on the Poisson correction method and bootstrapped with 200 replicates. Both  
301 trees were rooted with the protein sequences of five form II CO dehydrogenase  
302 catalytic subunit sequences (WP\_012893108.1, WP\_012950878.1,  
303 WP\_013076571.1, WP\_01359081.1, WP\_013388721.1). We confirmed that trees of  
304 similar topology were produced upon using a range of phylogenetic methods, namely  
305 neighbor-joining, maximum-parsimony and maximum-likelihood in MEGA, Mr Bayes,  
306 phylml, and iqtree. In addition, equivalent trees were created by using the protein  
307 sequences of the CO dehydrogenase medium subunit (CoxM), small subunits (CoxS),

308 or concatenations of all three subunits (CoxLMS). Varying the form II CO  
309 dehydrogenase sequence used also had no effect on the overall topology.

## 310 **Metagenome and metatranscriptome analysis**

311 Forty pairs of metagenomes and metatranscriptomes that encompassed a range of  
312 soil and marine sample types were selected and downloaded from the Joint Genome  
313 Institute (JGI) Integrated Microbial Genomes System [76] and the NCBI Sequence  
314 Read Archive (SRA) [77]. **Table S5** provides details of the datasets used. Raw  
315 metagenomes and metatranscriptomes were subjected to quality filtering using NGS  
316 QC Toolkit [78] (version 2.3.3, default settings, i.e. base quality score and read length  
317 threshold are 20 and 70%, respectively). SortMeRNA [79] (version 2.1, default settings  
318 and default rRNA databases) was used to removed ribosomal RNA (rRNA) reads from  
319 metatranscriptomes. Each metagenome and metatranscriptome was subsampled to  
320 an equal depth of 5 million reads and 2 million reads, respectively, using seqtk  
321 (<https://github.com/lh3/seqtk>) seeded with parameter -s100. Subsampled datasets  
322 were then screened in DIAMOND (version 0.9.24.125, default settings, one maximum  
323 target sequence per query) [80] using the 709 CoxL protein sequences (**Table S3**)  
324 and the 3261 hydrogenase catalytic subunit gene sequences from HydDB [81]. Hits to  
325 CoxL were filtered with an amino acid alignment length over 40 residues and a  
326 sequence identity over 60%. Clade classification of the reads was based on their  
327 closest match to the CoxL sequence dataset. Hydrogenase hits were filtered with the  
328 same amino acid alignment length cutoff and a sequence identity over 50%. Group 4  
329 [NiFe]-hydrogenase hits with a sequence identity below 60% were discarded.

330

## 331 **Results**

### 332 ***Mycobacterium smegmatis* synthesizes carbon monoxide dehydrogenase** 333 **during a coordinated response to organic carbon starvation**

334 We first performed a proteome analysis to gain a system-wide context of the levels of  
335 CO dehydrogenase during growth and survival of *M. smegmatis*. Shotgun proteomes  
336 were compared for triplicate cultures grown in glycerol-supplemented minimal media  
337 under two conditions: mid-exponential growth (OD<sub>600</sub> ~ 0.25; 5.1 mM glycerol left in  
338 medium) and mid-stationary phase following carbon limitation (72 hours post OD<sub>max</sub>

339 ~0.9; no glycerol detectable in medium) (**Fig. 1a**). There was a major change in the  
340 proteome profile, with 270 proteins more abundant and 357 proteins less abundant by  
341 at least four-fold ( $p < 0.05$ ) in the carbon-limited condition (**Fig. 1b; Table S2**).

342 The top 50 proteins with increased abundance included those involved in trace gas  
343 metabolism and amino acid catabolism. In line with our hypotheses, there was an  
344 increase in the structural subunits encoding a putative form I CO dehydrogenase,  
345 including a 54-fold increase in the catalytic subunit CoxL. Levels of the two uptake  
346 hydrogenases also increased, particularly the catalytic subunit of hydrogenase-2  
347 (HhyL, 148-fold), in line with previous observations that mycobacteria persist on  
348 atmospheric H<sub>2</sub> [54, 63]. There was also evidence that *M. smegmatis* generates  
349 additional reductant in this condition by catabolizing amino acid reserves: the three  
350 subunits of a branched-chain keto-acid dehydrogenase complex were the most  
351 differentially abundant proteins overall and there was also a strong induction of the  
352 proline degradation pathway, including the respiratory proline dehydrogenase (**Fig.**  
353 **1b**).

354 The abundance of various enzymes mediating organic carbon catabolism decreased,  
355 including the respiratory glycerol 3-phosphate dehydrogenase (10-fold) and glycerol  
356 kinase (8-fold), in line with cultures having exhausted glycerol supplies (**Fig. 1b**). The  
357 proteome also suggests that various energetically-expensive processes, such as cell  
358 wall, ribosome, and DNA synthesis, were downregulated (**Table S2**). Overall, these  
359 results suggest that *M. smegmatis* reduces its energy expenditure and expands its  
360 metabolic repertoire, including by oxidizing CO, to stay energized during starvation.

361

### 362 **Carbon monoxide dehydrogenase mediates atmospheric CO oxidation and** 363 **supports aerobic respiration**

364 Having confirmed that a putative CO dehydrogenase is present in stationary-phase *M.*  
365 *smegmatis* cells, we subsequently confirmed its activity through whole-cell  
366 biochemical assays. To do so, we constructed a markerless deletion of the *coxL* gene  
367 (MSMEG\_0746) (**Fig. S1**). Native polyacrylamide gels containing fractions of wild-type  
368 *M. smegmatis* harvested in carbon-limited stationary-phase cells strongly stained for  
369 CO dehydrogenase activity in a 100% CO atmosphere; the molecular weight of the

370 band corresponds to the theoretical molecular weight of a dimer of CoxLMS subunits  
371 (~269 kDa). However, no activity was observed in the  $\Delta\text{coxL}$  background (**Fig. 2a**).

372 Gas chromatography measurements confirmed that *M. smegmatis* oxidized carbon  
373 monoxide at atmospheric concentrations. Stationary-phase cultures oxidized the CO  
374 supplemented in the headspace (~200 ppmv) to sub-atmospheric concentrations (46  
375  $\pm$  5 ppbv) within 100 hours (**Fig. 2b**). The apparent kinetic parameters of this activity  
376 ( $V_{\text{max app}} = 3.13 \text{ nmol g}_{\text{dw}}^{-1} \text{ min}^{-1}$ ;  $K_{\text{m app}} = 350 \text{ nM}$ ; threshold<sub>app</sub> = 43 pM) are consistent  
377 with a moderate-affinity, slow-acting enzyme (**Fig. 2c; Table S4**). The rates are similar  
378 to those previously measured for hydrogenase-2 [63]. No change in CO mixing ratios  
379 was observed for the  $\Delta\text{coxL}$  strain (**Fig. 2b**), confirming that the form I CO  
380 dehydrogenase is the sole CO-oxidizing enzyme in *M. smegmatis*. In turn, these  
381 results provide the first genetic proof that form I CO dehydrogenases mediate  
382 atmospheric CO oxidation.

383 We performed oxygen electrode experiments to confirm whether CO addition  
384 stimulated aerobic respiration. In stationary-phase cultures, addition of CO caused a  
385 15-fold stimulation of respiratory O<sub>2</sub> consumption relative to background rates ( $p <$   
386  $0.0001$ ). This stimulation was observed in the wild-type strain, but not the  $\Delta\text{coxL}$   
387 mutant, showing it is dependent on CO oxidation activity of the CO dehydrogenase  
388 (**Fig. 2d & 2e**). Thus, while this enzyme is predominantly localized in the cytosol (**Fig.**  
389 **2a**), it serves as a *bona fide* respiratory dehydrogenase that supports aerobic  
390 respiration in *M. smegmatis*.

391

### 392 **Carbon monoxide is dispensable for growth and detoxification, but enhances** 393 **survival during carbon starvation**

394 We then performed a series of experiments to resolve the expression and importance  
395 of the CO dehydrogenase during growth and survival. Consistent with the proteomic  
396 analyses, expression levels of *coxL* were low in carbon-replete cultures (mid-  
397 exponential phase;  $1.35 \times 10^7$  transcripts  $\text{g}_{\text{dw}}^{-1}$ ) and increased 56-fold in carbon-limited  
398 cultures (mid-stationary phase;  $7.48 \times 10^8$  transcripts  $\text{g}_{\text{dw}}^{-1}$ ;  $p < 0.01$ ). Addition of 1%  
399 CO did not significantly change *coxL* expression in either growing or stationary  
400 cultures (**Fig. 3a**). These profiles suggest that *M. smegmatis* expresses CO

401 dehydrogenase primarily to enhance survival by scavenging atmospheric CO, rather  
402 than to support growth on elevated levels of CO.

403 These inferences were confirmed by monitoring the growth of the wild-type and  $\Delta\text{coxL}$   
404 strains under different conditions. The strains grew identically on glycerol-  
405 supplemented minimal medium. Addition of 20% CO caused a slight increase in  
406 doubling time for both strains and did not affect growth yield (**Fig. 3b**). This suggests  
407 that *M. smegmatis* is highly tolerant of CO but does not require CO dehydrogenase to  
408 detoxify it. *M. smegmatis* did not grow chemolithoautotrophically on a minimal medium  
409 with 20% CO as the sole carbon and energy source (**Fig. 3b**). While carboxydrotrophic  
410 growth was previously reported for this strain, the authors potentially observed CO-  
411 tolerant heterotrophic or mixotrophic growth, given the reported media contained  
412 metabolizable organic carbon sources [40]. Consistently, *M. smegmatis* lacks key  
413 enzymes of the Calvin-Benson cycle (e.g. RuBisCO, ribulose 1,5-bisphosphate  
414 carboxylase) typically required for carboxydrotrophic growth.

415 Finally, we monitored the long-term survival of the two strains after they reached  
416 maximum cell counts upon exhausting glycerol supplies (**Fig. 1a**). The percentage  
417 survival of the  $\Delta\text{coxL}$  strain was lower than the wild-type at all timepoints, including by  
418 45% after four weeks and 50% after five weeks of persistence. These findings were  
419 reproducible across two independent experiments and were significant at the 98%  
420 confidence level (**Fig. 3c**). Such reductions in relative percentage survival are similar  
421 to those previously observed for uptake hydrogenase mutants in *M. smegmatis* (47%)  
422 [53, 54] and *Streptomyces avermilitis* (74%) [57]. These experiments therefore provide  
423 genetic proof that atmospheric CO oxidation mediated by form I CO dehydrogenases  
424 enhances bacterial persistence.

425

## 426 **Atmospheric carbon monoxide oxidation is an ancient, taxonomically** 427 **widespread and ecologically important process**

428 We subsequently surveyed genomic, metagenomic, and metatranscriptomic datasets  
429 to gain insights the taxonomic and ecological distribution of atmospheric CO oxidation.  
430 This yielded 709 amino acid sequences encoding large subunits of the form I CO  
431 dehydrogenases (CoxL) across some 685 species, 196 genera, 49 orders, and 25  
432 classes of bacteria and archaea (**Table S3; Fig. 4a & 4b**). The retrieved sequences

433 encompassed all sequenced species, across seven phyla (**Figure 4b**) that have  
434 previously been shown to mediate aerobic CO oxidation (**Table S1**). We also detected  
435 *coxL* genes in nine other phyla where aerobic CO oxidation has yet to be  
436 experimentally demonstrated (**Fig. 4b**). Hence, the capacity for aerobic CO respiration  
437 appears to be a much more widespread trait among aerobic bacteria and archaea than  
438 previously reported [49, 62]. It is particularly notable that *coxL* genes were detected in  
439 representatives of seven of the nine [64, 82] most dominant soil phyla, namely  
440 Proteobacteria, Actinobacteriota, Acidobacteriota, Chloroflexota, Firmicutes,  
441 Gemmatimonadota, and Bacteroidota (**Fig. 4b**).

442 We constructed phylogenetic trees to visualize the evolutionary relationships of CoxL  
443 protein sequences (**Fig. 4a; Fig. S2**). The trees contained five monophyletic clades  
444 that differed in phylum-level composition, namely actinobacterial, proteobacterial, and  
445 halobacterial clades, as well as mid-branching major (mixed 1) and minor (mixed 2)  
446 clades of mixed composition containing representatives from seven and three different  
447 phyla respectively. Clades were well-supported by bootstrap values, with exception of  
448 the mixed 2 clade (**Fig. 4a; Fig. S2**). Trees with equivalent clades were produced  
449 when using seven distinct phylogenetic methods, using other CO dehydrogenase  
450 subunits (CoxM, CoxS, and CoxLMS concatenations), or varying the outgroup  
451 sequences. In all cases, major clades included CoxL proteins of at least one previously  
452 characterized carboxydrotroph or carboxydovore (**Table S1**). Surprisingly, all clades  
453 also contained species that have been previously shown to oxidize atmospheric CO  
454 (**Table S1**). This suggests that atmospheric CO oxidation is a widespread and  
455 ancestral capability among CO dehydrogenases. In contrast, CO dehydrogenases  
456 known to support aerobic carboxydrotrophic growth were sparsely distributed across  
457 the tree (**Fig. 4a; Table S1**).

458 To better understand the ecological significance of aerobic CO oxidation, we surveyed  
459 the abundance of *coxL* sequences across 40 pairs of metagenomes and  
460 metatranscriptomes (**Table S5**). Genes and transcripts for *coxL* were detected across  
461 a wide range of biomes. They were particularly abundant in the oxic terrestrial and  
462 marine samples surveyed (1 in every 8,000 reads), for example grassland and  
463 rainforest soils, coastal and mesopelagic seawater, and salt marshes (**Table S6**). In  
464 contrast, they were expressed at very low levels in anaerobic samples (e.g.  
465 groundwater, deep subsurface, peatland) (**Figure S3**). Across all surveyed

466 metatranscriptomes, the majority of the *coxL* hits were affiliated with the mixed 1 (40%),  
467 proteobacterial (25%), and actinobacterial (25%) clades, with minor representation of  
468 the mixed 2 (8%) and halobacterial (2%) clades (**Table S6**). The normalized transcript  
469 abundance of *coxL* was higher than the genetic determinants of atmospheric H<sub>2</sub>  
470 oxidation (*hhyL*; high-affinity hydrogenase) in most samples (18-fold in aquatic  
471 samples, 1.2-fold in terrestrial samples) (**Fig. 4c**). Together, this suggests that CO  
472 oxidation is of major importance in aerated environments and is mediated by a wide  
473 range of bacteria and archaea.

474

## 475 Discussion

476 In this work, we validated that atmospheric CO oxidation supports bacterial survival  
477 during nutrient limitation. *M. smegmatis* increases the transcription and synthesis of a  
478 form I CO dehydrogenase by 50-fold as part of a coordinated response to organic  
479 carbon limitation. Biochemical studies confirmed that this enzyme is kinetically  
480 adapted to scavenge atmospheric concentrations of CO and use the derived electrons  
481 to support aerobic respiration. In turn, genetic deletion of the enzyme did not affect  
482 growth under a range of conditions, but resulted in severe survival defects in carbon-  
483 exhausted cultures. These observations are reminiscent of previous observations that  
484 *M. smegmatis* expresses two high-affinity hydrogenases to persist by scavenging  
485 atmospheric H<sub>2</sub> [53–55, 63]. In common with atmospheric H<sub>2</sub>, atmospheric CO is a  
486 high-energy, diffusible, and ubiquitous trace gas [28], and is therefore a dependable  
487 source of energy to sustain the maintenance needs of bacteria during persistence.  
488 Overall, the proteome results suggest that *M. smegmatis* activates CO scavenging as  
489 a core part of a wider response to enhance its metabolic repertoire; the organism  
490 appears to switch from acquiring energy organotrophically during growth to  
491 mixotrophically during survival by scavenging a combination of inorganic and organic  
492 energy sources.

493 In turn, it is probable that CO supports the persistence of many other bacterial and  
494 archaeal species. Atmospheric CO oxidation is a common trait among all  
495 carboxydovores tested to date and has been experimentally demonstrated in 18  
496 diverse genera of bacteria and archaea [19, 29, 33, 36, 43, 44, 48]. In this regard, a  
497 recent study demonstrated that the hot spring bacterium *Thermomicrobium roseum*



498 (phylum Chloroflexota) upregulates a form I CO dehydrogenase and oxidizes  
499 atmospheric CO as part of a similar response to carbon starvation [44]. It has also  
500 been demonstrated that the form I CO dehydrogenases of the known atmospheric CO  
501 scavenger *Ruegeria pomolori* [58] and a *Phaeobacter* isolate [59] from the marine  
502 *Roseobacter* clade (phylum Proteobacteria) are also highly upregulated under energy-  
503 limiting conditions. The capacity for atmospheric CO uptake has also been  
504 demonstrated in four halophilic archaeal genera (phylum Halobacterota) [33, 48] and  
505 may also extend to thermophilic archaea (phylum Crenarchaeota) [46, 47]. Moreover,  
506 two cultured aerobic methanotrophs harbour the capacity for aerobic CO respiration  
507 [83, 84]. Our study, by showing through a molecular genetic approach that CO  
508 oxidation enhances survival, provides a physiological rationale for these observations.

509 These results also have broader implications for understanding the biogeochemical  
510 cycling and microbial biodiversity at the ecosystem level. It is well-established that soil  
511 bacteria are major net sinks for atmospheric CO and marine bacteria mitigate  
512 geochemical oceanic emissions of this gas [10]. This study, by confirming the enzymes  
513 responsible and demonstrating that their activities support bacterial persistence, has  
514 ramifications for modelling these biogeochemical processes. In turn, we propose that  
515 CO is an important energy source supporting the biodiversity and stability of aerobic  
516 heterotrophic communities in terrestrial and aquatic environments. The genomic  
517 survey supports this by demonstrating that form I CO dehydrogenases, most of which  
518 are predicted to support atmospheric CO oxidation, are encoded by 685 species and  
519 16 phyla of bacteria and archaea. In turn, the metagenomic and metatranscriptomic  
520 analyses confirmed that *coxL* genes and transcripts are highly abundant in most  
521 aerated soil and marine ecosystems. The notably high abundance of *coxL* transcripts  
522 in pelagic samples of various depths suggests CO may be a major energy source for  
523 maintenance of marine bacteria. In soils, the oxidation of atmospheric CO may be of  
524 similar importance to atmospheric H<sub>2</sub>; this is suggested by the strength of the soil sinks  
525 for these gases [1, 85], the abundance of *coxL* and *hhyL* genes in soil metagenomes,  
526 and the distribution of these genes in the genomes of soil bacteria [86]. Atmospheric  
527 CO may be especially important for sustaining communities in highly oligotrophic soils,  
528 as indicated by previous studies in polar deserts [51], volcanic deposits [60, 62, 87],  
529 and salt flats [33, 88, 89]. Further work is now needed to understand which

530 microorganisms mediate consumption of atmospheric CO *in situ* and how their activity  
531 is controlled by physicochemical factors.

532 Integrating these findings with the wider literature, we propose a new survival-centric  
533 model for the evolution of CO dehydrogenases. It was traditionally thought that aerobic  
534 CO oxidation primarily supports autotrophic and mixotrophic growth of  
535 microorganisms [11, 26]. However, the majority of studied CO-oxidizing bacteria are  
536 in fact carboxydovores, of which those that have been kinetically characterized can  
537 oxidize CO at sub-atmospheric levels (**Table S1**). In turn, our phylogenomic analysis  
538 revealed that atmospheric CO-oxidizing bacteria are represented in all five clades of  
539 the phylogenetic tree, suggesting that the common ancestor of these enzymes also  
540 harbored sufficient substrate affinity to oxidize atmospheric CO. On this basis, we  
541 propose that microorganisms first evolved a sufficiently high-affinity form I CO  
542 dehydrogenase to subsist on low concentrations of CO. The genes encoding this  
543 enzyme were then horizontally and vertically disseminated to multiple bacterial and  
544 archaeal genera inhabiting different environments. On multiple occasions, certain  
545 bacterial lineages evolved to support growth on CO in microenvironments where  
546 present at elevated concentrations. This would have required relatively straightforward  
547 evolutionary innovations, namely acquisition of Calvin-Benson cycle enzymes (e.g.  
548 RuBisCO) and their integration with CO dehydrogenase. The modulation of CO  
549 dehydrogenase kinetics was likely not a prerequisite, given these enzymes efficiently  
550 oxidize CO at a wide range of substrate concentrations [19, 44], but may have  
551 subsequently enhanced carboxydrotrophic growth. These inferences differ from  
552 hydrogenases, where high-affinity, oxygen-tolerant enzymes appear to have evolved  
553 from low-affinity, oxygen-sensitive ones [86]. However, it is probable that the  
554 processes of atmospheric CO and H<sub>2</sub> oxidation evolved due to similar physiological  
555 pressures and over similar evolutionary timescales.

556

## 557 **Footnotes**

558 Author contributions: C.G. conceived this study. C.G., P.R.F.C., K.B., P.M.L., G.M.K.,  
559 R.B.S., and C.H. designed experiments and analyzed data. C.G. and P.R.F.C.  
560 supervised students. Different authors were responsible for proteomic analysis (C.H.,  
561 R.B.S., P.R.F.C., C.G.), knockout construction (P.R.F.C.), activity measurements

562 (K.B., P.R.F.C., Z.I.), respirometry analysis (P.R.F.C.), expression profiling (K.B.,  
563 P.R.F.C.), growth analysis (K.B.), survival assays (K.B.), genome surveys (C.G.),  
564 phylogenetic analysis (G.M.K., C.G.), and meta-omic analysis (P.M.L., C.G.). C.G.,  
565 P.R.F.C., and K.B. wrote and edited the paper with input from all authors.

566 Acknowledgements: This work was supported by an ARC DECRA Fellowship  
567 (DE170100310; awarded to C.G.), an NHMRC New Investigator Grant (APP5191146;  
568 awarded to C.G.), an Australian Government Research Training Program Stipend  
569 Scholarship (awarded to K.B. and Z.I.), and Monash University Doctoral Scholarships  
570 (awarded to P.R.F.C. and P.M.L.). We thank Dr George Taiaroa and A/Prof Debbie  
571 Williamson for sequencing the mutants, Blair Ney and Thanavit Jirapanjawat for their  
572 technical assistance, and Dr Eleonora Chiri for critically reading the manuscript.

573 The authors declare no conflict of interest.

574

575

## 576 **References**

- 577 1. Khalil MAK, Rasmussen RA. The global cycle of carbon monoxide: Trends and  
578 mass balance. *Chemosphere* 1990; **20**: 227–242.
- 579 2. Novelli PC, Masarie KA, Lang PM. Distributions and recent changes of carbon  
580 monoxide in the lower troposphere. *J Geophys Res Atmos* 1998; **103**: 19015–  
581 19033.
- 582 3. Chi X, Winderlich J, Mayer J-C, Panov A V, Heimann M, Birmili W, et al. Long-  
583 term measurements of aerosol and carbon monoxide at the ZOTTO tall tower  
584 to characterize polluted and pristine air in the Siberian taiga. *Atmos Chem*  
585 *Phys* 2013; **13**: 12271–12298.
- 586 4. Petrenko V V, Martinerie P, Novelli P, Etheridge DM, Levin I, Wang Z, et al. A  
587 60 yr record of atmospheric carbon monoxide reconstructed from Greenland  
588 firn air. *Atmos Chem Phys* 2013; **13**: 7567–7585.
- 589 5. Bartholomew GW, Alexander M. Soil as a sink for atmospheric carbon  
590 monoxide. *Science* 1981; **212**: 1389–1391.
- 591 6. Inman RE, Ingersoll RB, Levy EA. Soil: a natural sink for carbon monoxide.  
592 *Science* 1971; **172**: 1229–1231.
- 593 7. Kirschke S, Bousquet P, Ciais P, Saunois M, Canadell JG, Dlugokencky EJ, et  
594 al. Three decades of global methane sources and sinks. *Nat Geosci* 2013; **6**:  
595 813–823.
- 596 8. Swinnerton JW, Linnenbom VJ, Lamontagne RA. The ocean: a natural source  
597 of carbon monoxide. *Science* 1970; **167**: 984–986.

- 598 9. Xie H, Bélanger S, Demers S, Vincent WF, Papakyriakou TN.  
599 Photobiogeochemical cycling of carbon monoxide in the southeastern Beaufort  
600 Sea in spring and autumn. *Limnol Oceanogr* 2009; **54**: 234–249.
- 601 10. Zafiriou OC, Andrews SS, Wang W. Concordant estimates of oceanic carbon  
602 monoxide source and sink processes in the Pacific yield a balanced global  
603 “blue-water” CO budget. *Global Biogeochem Cycles* 2003; **17**.
- 604 11. King GM, Weber CF. Distribution, diversity and ecology of aerobic CO-  
605 oxidizing bacteria. *Nat Rev Microbiol* 2007; **5**: 107–118.
- 606 12. Zavarzin GA, Nozhevnikova AN. Aerobic carboxydobacteria. *Microb Ecol*  
607 1977; **3**: 305–326.
- 608 13. Meyer O, Schlegel HG. Reisolation of the carbon monoxide utilizing hydrogen  
609 bacterium *Pseudomonas carboxydovorans* (Kistner) comb. nov. *Arch Microbiol*  
610 1978; **118**: 35–43.
- 611 14. Lorite MJ, Tachil J, Sanjuán J, Meyer O, Bedmar EJ. Carbon monoxide  
612 dehydrogenase activity in *Bradyrhizobium japonicum*. *Appl Environ Microbiol*  
613 2000; **66**: 1871–1876.
- 614 15. Kiessling M, Meyer O. Profitable oxidation of carbon monoxide or hydrogen  
615 during heterotrophic growth of *Pseudomonas carboxydoflava*. *FEMS Microbiol*  
616 *Lett* 1982; **13**: 333–338.
- 617 16. Sorokin DY, Tourova TP, Kovaleva OL, Kuenen JG, Muyzer G. Aerobic  
618 carboxydrotrophy under extremely haloalkaline conditions in  
619 *Alkalispirillum/Alkalilimnicola* strains isolated from soda lakes. *Microbiology*  
620 2010; **156**: 819–827.
- 621 17. Cypionka H, Meyer O, Schlegel HG. Physiological characteristics of various  
622 species of strains of carboxydobacteria. *Arch Microbiol* 1980; **127**: 301–307.
- 623 18. King GM. Uptake of carbon monoxide and hydrogen at environmentally  
624 relevant concentrations by Mycobacteria. *Appl Environ Microbiol* 2003; **69**:  
625 7266–7272.
- 626 19. Gadkari D, Schricker K, Acker G, Kroppenstedt RM, Meyer O. *Streptomyces*  
627 *thermoautotrophicus* sp. nov., a thermophilic CO- and H<sub>2</sub>-oxidizing obligate  
628 chemolithoautotroph. *Appl Environ Microbiol* 1990; **56**: 3727–3734.
- 629 20. O’Donnell AG, Falconer C, Goodfellow M, Ward AC, Williams E.  
630 Biosystematics and diversity amongst novel carboxydrotrophic actinomycetes.  
631 *Antonie Van Leeuwenhoek* 1993; **64**: 325–340.
- 632 21. Kim SB, Falconer C, Williams E, Goodfellow M. *Streptomyces*  
633 *thermoautotrophicus* sp. nov. and *Streptomyces thermoautotrophicus* sp.  
634 nov., two moderately thermophilic carboxydrotrophic species from soil. *Int J*  
635 *Syst Evol Microbiol* 1998; **48**: 59–68.
- 636 22. Krüger B, Meyer O. Thermophilic bacilli growing with carbon monoxide. *Arch*  
637 *Microbiol* 1984; **139**: 402–408.
- 638 23. Kraut M, Meyer O. Plasmids in carboxydrotrophic bacteria: physical and  
639 restriction analysis. *Arch Microbiol* 1988; **149**: 540–546.
- 640 24. Dobbek H, Gremer L, Meyer O, Huber R. Crystal structure and mechanism of  
641 CO dehydrogenase, a molybdo iron-sulfur flavoprotein containing S-

- 642 selanlylcysteine. *Proc Natl Acad Sci* 1999; **96**: 8884–8889.
- 643 25. Dobbek H, Gremer L, Kiefersauer R, Huber R, Meyer O. Catalysis at a  
644 dinuclear [CuSMo (O) OH] cluster in a CO dehydrogenase resolved at 1.1-Å  
645 resolution. *Proc Natl Acad Sci* 2002; **99**: 15971–15976.
- 646 26. Meyer O, Schlegel HG. Biology of aerobic carbon monoxide-oxidizing bacteria.  
647 *Annu Rev Microbiol* 1983; **37**: 277–310.
- 648 27. Conrad R, Meyer O, Seiler W. Role of carboxydobacteria in consumption of  
649 atmospheric carbon monoxide by soil. *Appl Environ Microbiol* 1981; **42**: 211–  
650 215.
- 651 28. Conrad R. Soil microorganisms as controllers of atmospheric trace gases (H<sub>2</sub>,  
652 CO, CH<sub>4</sub>, OCS, N<sub>2</sub>O, and NO). *Microbiol Mol Biol Rev* 1996; **60**: 609–640.
- 653 29. King GM. Molecular and culture-based analyses of aerobic carbon monoxide  
654 oxidizer diversity. *Appl Environ Microbiol* 2003; **69**: 7257–7265.
- 655 30. Weber CF, King GM. Physiological, ecological, and phylogenetic  
656 characterization of *Stappia*, a marine CO-oxidizing bacterial genus. *Appl*  
657 *Environ Microbiol* 2007; **73**: 1266–76.
- 658 31. Cunliffe M. Physiological and metabolic effects of carbon monoxide oxidation  
659 in the model marine bacterioplankton *Ruegeria pomeroyi* DSS-3. *Appl Environ*  
660 *Microbiol* 2013; **79**: 738–740.
- 661 32. Cunliffe M. Correlating carbon monoxide oxidation with *cox* genes in the  
662 abundant marine *Roseobacter* clade. *ISME J* 2011; **5**: 685.
- 663 33. King GM. Carbon monoxide as a metabolic energy source for extremely  
664 halophilic microbes: implications for microbial activity in Mars regolith. *Proc*  
665 *Natl Acad Sci* 2015; 4465–4470.
- 666 34. Hoefft SE, Blum JS, Stolz JF, Tabita FR, Witte B, King GM, et al. *Alkalilimnicola*  
667 *ehrllichii* sp. nov., a novel, arsenite-oxidizing haloalkaliphilic  
668 gammaproteobacterium capable of chemoautotrophic or heterotrophic growth  
669 with nitrate or oxygen as the electron acceptor. *Int J Syst Evol Microbiol* 2007;  
670 **57**: 504–512.
- 671 35. Weber CF, King GM. The phylogenetic distribution and ecological role of  
672 carbon monoxide oxidation in the genus *Burkholderia*. *FEMS Microbiol Ecol*  
673 2012; **79**: 167–175.
- 674 36. Weber CF, King GM. Volcanic soils as sources of novel CO-Oxidizing  
675 *Paraburkholderia* and *Burkholderia*: *Paraburkholderia hiiakae* sp. nov.,  
676 *Paraburkholderia metrosideri* sp. nov., *Paraburkholderia paradisi* sp. nov.,  
677 *Paraburkholderia peleae*. *Front Microbiol* 2017; **8**: 207.
- 678 37. Bartholomew GW, Alexander M. Microbial metabolism of carbon monoxide in  
679 culture and in soil. *Appl Environ Microbiol* 1979; **37**: 932–937.
- 680 38. Patrauchan MA, Miyazawa D, LeBlanc JC, Aiga C, Florizone C, Dosanjh M, et  
681 al. Proteomic analysis of survival of *Rhodococcus jostii* RHA1 during carbon  
682 starvation. *Appl Environ Microbiol* 2012; **78**: 6714–6725.
- 683 39. Yano T, Yoshida N, Takagi H. Carbon monoxide utilization of an extremely  
684 oligotrophic bacterium, *Rhodococcus erythropolis* N9T-4. *J Biosci Bioeng*  
685 2012; **114**: 53–55.

- 686 40. Park SW, Hwang EH, Park H, Kim JA, Heo J, Lee KH, et al. Growth of  
687 mycobacteria on carbon monoxide and methanol. *J Bacteriol* 2003; **185**: 142–  
688 147.
- 689 41. King CE. Diversity and activity of aerobic thermophilic carbon monoxide-  
690 oxidizing bacteria on Kilauea Volcano, Hawaii. 2013.
- 691 42. Wu D, Raymond J, Wu M, Chatterji S, Ren Q, Graham JE, et al. Complete  
692 genome sequence of the aerobic CO-oxidizing thermophile *Thermomicrobium*  
693 *roseum*. *PLoS One* 2009; **4**: e4207.
- 694 43. King CE, King GM. *Thermomicrobium carboxidum* sp. nov., and *Thermorudis*  
695 *peleae* gen. nov., sp. nov., carbon monoxide-oxidizing bacteria isolated from  
696 geothermally heated biofilms. *Int J Syst Evol Microbiol* 2014; **64**: 2586–2592.
- 697 44. Islam ZF, Cordero PRF, Feng J, Chen Y-J, Bay S, Gleadow RM, et al. Two  
698 Chloroflexi classes independently evolved the ability to persist on atmospheric  
699 hydrogen and carbon monoxide. *ISME J* 2019; in press.
- 700 45. King CE, King GM. Description of *Thermogemmatispora carboxidivorans* sp.  
701 nov., a carbon-monoxide-oxidizing member of the class Ktedonobacteria  
702 isolated from a geothermally heated biofilm, and analysis of carbon monoxide  
703 oxidation by members of the class Ktedonobacter. *Int J Syst Evol Microbiol*  
704 2014; **64**: 1244–1251.
- 705 46. Nishimura H, Nomura Y, Iwata E, Sato N, Sako Y. Purification and  
706 characterization of carbon monoxide dehydrogenase from the aerobic  
707 hyperthermophilic archaeon *Aeropyrum pernix*. *Fish Sci* 2010; **76**: 999–1006.
- 708 47. Sokolova TG, Yakimov MM, Chernyh NA, Lun'kova EY, Kostrikina NA,  
709 Taranov EA, et al. Aerobic carbon monoxide oxidation in the course of growth  
710 of a hyperthermophilic archaeon, *Sulfolobus* sp. ETSY. *Microbiology* 2017; **86**:  
711 539–548.
- 712 48. McDuff S, King GM, Neupane S, Myers MR. Isolation and characterization of  
713 extremely halophilic CO-oxidizing Euryarchaeota from hypersaline cinders,  
714 sediments and soils and description of a novel CO oxidizer, *Haloferax*  
715 *namakaokahaiae* Mke2. 3T, sp. nov. *FEMS Microbiol Ecol* 2016; **92**.
- 716 49. Quiza L, Lalonde I, Guertin C, Constant P. Land-use influences the distribution  
717 and activity of high affinity CO-oxidizing bacteria Associated to type I-coxL  
718 genotype in soil. *Front Microbiol* 2014; **5**: 271.
- 719 50. Greening C, Constant P, Hards K, Morales SE, Oakeshott JG, Russell RJ, et  
720 al. Atmospheric hydrogen scavenging: from enzymes to ecosystems. *Appl*  
721 *Environ Microbiol* 2015; **81**: 1190–1199.
- 722 51. Ji M, Greening C, Vanwonterghem I, Carere CR, Bay SK, Steen JA, et al.  
723 Atmospheric trace gases support primary production in Antarctic desert  
724 surface soil. *Nature* 2017; **552**: 400–403.
- 725 52. Constant P, Chowdhury SP, Pratscher J, Conrad R. Streptomycetes  
726 contributing to atmospheric molecular hydrogen soil uptake are widespread  
727 and encode a putative high-affinity [NiFe]-hydrogenase. *Environ Microbiol*  
728 2010; **12**: 821–829.
- 729 53. Berney M, Cook GM. Unique flexibility in energy metabolism allows

- 730 mycobacteria to combat starvation and hypoxia. *PLoS One* 2010; **5**: e8614.
- 731 54. Greening C, Villas-Bôas SG, Robson JR, Berney M, Cook GM. The growth  
732 and survival of *Mycobacterium smegmatis* is enhanced by co-metabolism of  
733 atmospheric H<sub>2</sub>. *PLoS One* 2014; **9**: e103034.
- 734 55. Berney M, Greening C, Conrad R, Jacobs WR, Cook GM. An obligately  
735 aerobic soil bacterium activates fermentative hydrogen production to survive  
736 reductive stress during hypoxia. *Proc Natl Acad Sci U S A* 2014; **111**: 11479–  
737 11484.
- 738 56. Greening C, Carere CR, Rushton-Green R, Harold LK, Hards K, Taylor MC, et  
739 al. Persistence of the dominant soil phylum Acidobacteria by trace gas  
740 scavenging. *Proc Natl Acad Sci U S A* 2015; **112**: 10497–10502.
- 741 57. Liot Q, Constant P. Breathing air to save energy – new insights into the  
742 ecophysiological role of high-affinity [NiFe]-hydrogenase in *Streptomyces*  
743 *avermitilis*. *Microbiologyopen* 2016; **5**: 47–59.
- 744 58. Christie-Oleza JA, Fernandez B, Nogales B, Bosch R, Armengaud J.  
745 Proteomic insights into the lifestyle of an environmentally relevant marine  
746 bacterium. *ISME J* 2012; **6**: 124.
- 747 59. Muthusamy S, Lundin D, Mamede Branca RM, Baltar F, González JM, Lehtiö  
748 J, et al. Comparative proteomics reveals signature metabolisms of  
749 exponentially growing and stationary phase marine bacteria. *Environ Microbiol*  
750 2017; **19**: 2301–2319.
- 751 60. King GM. Contributions of atmospheric CO and hydrogen uptake to microbial  
752 dynamics on recent Hawaiian volcanic deposits. *Appl Environ Microbiol* 2003;  
753 **69**: 4067–4075.
- 754 61. King GM, Weber CF, Nanba K, Sato Y, Ohta H. Atmospheric CO and  
755 hydrogen uptake and CO oxidizer phylogeny for Miyake-jima, Japan Volcanic  
756 Deposits. *Microbes Environ* 2008; **23**: 299–305.
- 757 62. King GM, Weber CF. Interactions between bacterial carbon monoxide and  
758 hydrogen consumption and plant development on recent volcanic deposits.  
759 *ISME J* 2008; **2**: 195–203.
- 760 63. Greening C, Berney M, Hards K, Cook GM, Conrad R. A soil actinobacterium  
761 scavenges atmospheric H<sub>2</sub> using two membrane-associated, oxygen-  
762 dependent [NiFe] hydrogenases. *Proc Natl Acad Sci U S A* 2014; **111**: 4257–  
763 4261.
- 764 64. Delgado-Baquerizo M, Oliverio AM, Brewer TE, Benavent-González A,  
765 Eldridge DJ, Bardgett RD, et al. A global atlas of the dominant bacteria found  
766 in soil. *Science* 2018; **359**: 320–325.
- 767 65. Walsh CM, Gebert MJ, Delgado-Baquerizo M, Maestre F, Fierer N. A global  
768 survey of mycobacterial diversity in soil. *bioRxiv* 2019; 562439.
- 769 66. Snapper SB, Melton RE, Mustafa S, Kieser T, Jacobs WRJ. Isolation and  
770 characterization of efficient plasmid transformation mutants of *Mycobacterium*  
771 *smegmatis*. *Mol Microbiol* 1990; **4**: 1911–1919.
- 772 67. Hartmans S, De Bont JA. Aerobic vinyl chloride metabolism in *Mycobacterium*  
773 *aurum* L1. *Appl Environ Microbiol* 1992; **58**: 1220–1226.

- 774 68. Gebhard S, Tran SL, Cook GM. The Phn system of *Mycobacterium*  
775 *smegmatis*: a second high-affinity ABC-transporter for phosphate. *Microbiology*  
776 2006; **152**: 3453–3465.
- 777 69. Cox J, Mann M. MaxQuant enables high peptide identification rates,  
778 individualized ppb-range mass accuracies and proteome-wide protein  
779 quantification. *Nat Biotechnol* 2008; **26**: 1367.
- 780 70. Tyanova S, Temu T, Sinitcyn P, Carlson A, Hein MY, Geiger T, et al. The  
781 Perseus computational platform for comprehensive analysis of (prote) omics  
782 data. *Nat Methods* 2016; **13**: 731.
- 783 71. Smith PK et al, Krohn R II, Hermanson GT, Mallia AK, Gartner FH, Provenzano  
784 Md, et al. Measurement of protein using bicinchoninic acid. *Anal Biochem*  
785 1985; **150**: 76–85.
- 786 72. Walker JM. Nondenaturing polyacrylamide gel electrophoresis of proteins. *The*  
787 *protein protocols handbook*. 2009. Springer, pp 171–176.
- 788 73. Pruitt KD, Tatusova T, Maglott DR. NCBI reference sequences (RefSeq): a  
789 curated non-redundant sequence database of genomes, transcripts and  
790 proteins. *Nucleic Acids Res* 2007; **35**: D61–D65.
- 791 74. Altschul SF, Gish W, Miller W, Myers EW, Lipman DJ. Basic local alignment  
792 search tool. *J Mol Biol* 1990; **215**: 403–410.
- 793 75. Kumar S, Stecher G, Tamura K. MEGA7: Molecular Evolutionary Genetics  
794 Analysis version 7.0 for bigger datasets. *Mol Biol Evol* 2016; msw054.
- 795 76. Markowitz VM, Chen I-MA, Palaniappan K, Chu K, Szeto E, Grechkin Y, et al.  
796 IMG: the integrated microbial genomes database and comparative analysis  
797 system. *Nucleic Acids Res* . 2012. , **40**: D115-22
- 798 77. Leinonen R, Sugawara H, Shumway M, Collaboration INSD. The sequence  
799 read archive. *Nucleic Acids Res* 2010; **39**: D19–D21.
- 800 78. Patel RK, Jain M. NGS QC Toolkit: a toolkit for quality control of next  
801 generation sequencing data. *PLoS One* 2012; **7**: e30619.
- 802 79. Kopylova E, Noé L, Touzet H. SortMeRNA: fast and accurate filtering of  
803 ribosomal RNAs in metatranscriptomic data. *Bioinformatics* 2012; **28**: 3211–  
804 3217.
- 805 80. Buchfink B, Xie C, Huson DH. Fast and sensitive protein alignment using  
806 DIAMOND. *Nat Methods* 2014; **12**: 59.
- 807 81. Søndergaard D, Pedersen CNS, Greening C. HydDB: a web tool for  
808 hydrogenase classification and analysis. *Sci Rep* 2016; **6**: 34212.
- 809 82. Janssen PH. Identifying the dominant soil bacterial taxa in libraries of 16S  
810 rRNA and 16S rRNA genes. *Appl Environ Microbiol* 2006; **72**: 1719–1728.
- 811 83. Vorobev A V, Baani M, Doronina N V, Brady AL, Liesack W, Dunfield PF, et al.  
812 *Methyloferula stellata* gen. nov., sp. nov., an acidophilic, obligately  
813 methanotrophic bacterium that possesses only a soluble methane  
814 monooxygenase. *Int J Syst Evol Microbiol* 2011; **61**: 2456–2463.
- 815 84. Tveit AT, Hestnes AG, Robinson SL, Schintlmeister A, Dedysh SN, Jehmlich  
816 N, et al. Widespread soil bacterium that oxidizes atmospheric methane. *Proc*



- 817 *Natl Acad Sci* 2019; 201817812.
- 818 85. Ehhalt DH, Rohrer F. The tropospheric cycle of H<sub>2</sub>: a critical review. *Tellus B*  
819 2009; **61**: 500–535.
- 820 86. Greening C, Biswas A, Carere CR, Jackson CJ, Taylor MC, Stott MB, et al.  
821 Genomic and metagenomic surveys of hydrogenase distribution indicate H<sub>2</sub> is  
822 a widely utilised energy source for microbial growth and survival. *ISME J* 2016;  
823 **10**: 761–777.
- 824 87. Weber CF, King GM. Water stress impacts on bacterial carbon monoxide  
825 oxidation on recent volcanic deposits. *ISME J* 2009; **3**: 1325–1334.
- 826 88. King GM. Microbial carbon monoxide consumption in salt marsh sediments.  
827 *FEMS Microbiol Ecol* 2007; **59**: 2–9.
- 828 89. Myers MR, King GM. Perchlorate-coupled carbon monoxide (CO) oxidation:  
829 evidence for a plausible microbe-mediated reaction in Martian brines. *Front*  
830 *Microbiol* 2017; **8**: 2571.
- 831 90. Parks DH, Chuvochina M, Waite DW, Rinke C, Skarszewski A, Chaumeil P-A,  
832 et al. A standardized bacterial taxonomy based on genome phylogeny  
833 substantially revises the tree of life. *Nat Biotechnol* 2018; **36**: 996–1004.
- 834

## 835 Figures

836 **Figure 1. Comparison of proteome composition of carbon-replete and carbon-**  
837 **limited cultures of *Mycobacterium smegmatis*.** (a) Growth of *M. smegmatis* in  
838 Hartmans de Bont minimal medium supplemented with 5.8 mM glycerol. The glycerol  
839 concentration of the external medium is shown. Error bars show standard deviations  
840 of three biological replicates. Cells were harvested for proteomic analysis at  $OD_{600} =$   
841 0.25 (mid-exponential phase, glycerol-rich) and three days post  $OD_{max}$  (mid-stationary  
842 phase, glycerol-limited). (b) Volcano plot showing relative expression change of genes  
843 following carbon-limitation. Fold change was determined by dividing the relative  
844 abundance of each protein in three stationary phase proteomes with that in the three  
845 exponential phase proteomes (biological replicates). Each protein is represented by a  
846 grey dot. Structural subunits of selected metabolic enzymes, including the form I CO  
847 dehydrogenase, are highlighted and their locus numbers are shown in subscript in the  
848 legend.

849

850 **Figure 2. Comparison of carbon monoxide dehydrogenase activity of**  
851 ***Mycobacterium smegmatis* wild-type and  $\Delta coxL$  cultures.** (a) Zymographic  
852 observation of CO dehydrogenase activity and localization. The upper gel shows  
853 enzyme activity stained with the artificial electron acceptor nitroblue in a CO-rich  
854 atmosphere. The lower gel shows protein ladder and whole protein stained with  
855 Coomassie Blue. Results are shown for whole-cell lysates (L), cytosolic fractions (C),  
856 and membrane fractions (M) of wild-type (WT) and  $\Delta coxL$  cultures. (b) Gas  
857 chromatography measurement of CO oxidation to sub-atmospheric levels. Mixing  
858 ratios are displayed on a logarithmic scale, the dotted line shows the average  
859 atmospheric mixing ratios of CO (90 ppbv), and error bars show standard deviations  
860 of three biological replicates. (c) Apparent kinetic parameters of CO oxidation by wild-  
861 type cultures. Curves of best fit and kinetic parameters were calculated based on a  
862 Michaelis-Menten non-linear regression model.  $V_{max\ app}$  and  $K_{m\ app}$  values derived from  
863 other models are shown in **Table S4**. (d) Examples of traces from oxygen electrode  
864 measurements.  $O_2$  levels were measured before and after CO addition in both a wild-  
865 type and  $\Delta coxL$  background. (e) Summary of rates of  $O_2$  consumption measured using  
866 an oxygen electrode. Centre values show means and error bars show standard  
867 deviations from three biological replicates. For all values with different letters, the

868 difference between means is statistically significant ( $p < 0.001$ ) based on student's t-  
869 tests.

870

871 **Figure 3. Expression and importance of carbon monoxide dehydrogenase**  
872 **during growth and survival of *Mycobacterium smegmatis*.** (a) Normalized number  
873 of transcripts of the CO dehydrogenase large subunit gene (*coxL*; MSMEG\_0746) in  
874 wild-type cultures harvested during exponential phase (carbon-replete) and stationary  
875 phase (carbon-limited) in the presence of either ambient CO or 1% CO. Error bars  
876 show standard deviations of four biological replicates. For all values with different  
877 letters, the difference between means is statistically significant ( $p < 0.01$ ) based on  
878 student's t-tests. (b) Final growth yields ( $OD_{max}$ ) and specific growth rates wild-type  
879 and  $\Delta coxL$  strains. Strains were grown on Hartman de Bont minimal medium  
880 supplemented with either 5.5 mM glycerol, 20% CO, or both 5.5 mM glycerol and 20%  
881 CO. Values labelled with different letters are significantly different ( $p < 0.05$ ) based on  
882 student's t-tests. Error bars show standard deviations of three biological replicates. (c)  
883 Long-term survival of wild-type and  $\Delta coxL$  strains in Hartman de Bont minimal medium  
884 supplemented with either 5.5 mM glycerol. Percentage survival was calculated by  
885 dividing the colony forming units (CFU mL<sup>-1</sup>) at each timepoint with those counted at  
886  $OD_{max}$  (day 0). Error bars show standard deviations of nine biological replicates. For  
887 asterisked values, there was a significant difference in survival of  $\Delta coxL$  strains  
888 compared to the wild-type ( $p < 0.05$ ) based on student's t-tests.

889

890 **Figure 4. Distribution of carbon monoxide dehydrogenases in genomes,**  
891 **metagenomes, and metatranscriptomes.** (a) Maximum-likelihood phylogenetic tree  
892 showing the evolutionary history of the catalytic subunit of the form I CO  
893 dehydrogenase (CoxL). Evolutionary distances were computed using the Poisson  
894 correction model, gaps were treated by partial deletion, and the tree was bootstrapped  
895 with 200 replicates. The tree was constructed using a representative subset of 94  
896 CoxL amino acid sequences from **Table S3** and a neighbor-joining tree containing all  
897 709 CoxL sequences retrieved in this study is provided in **Fig. S2**. The major clades  
898 of the tree are labeled, and the colored bars represent the phylum that each sequence  
899 is affiliated with. The tree was rooted with five form II CO dehydrogenase sequences  
900 (not shown). (b) Phylum-level distribution of the CoxL-encoding species and orders  
901 identified in this work. (c) Abundance of *coxL* genes and transcripts in environmental

902 samples. In total, 40 pairs of metagenomes and metatranscriptomes (20 aquatic, 20  
903 terrestrial) were analyzed from a wide range of biomes (detailed in **Table S5**). The  
904 abundance of *hhyL* genes and transcripts, encoding the high-affinity group 1h [NiFe]-  
905 hydrogenase, are shown for comparison. Box plots show the individual values and  
906 their mean, quartiles, and range for each dataset.

**a**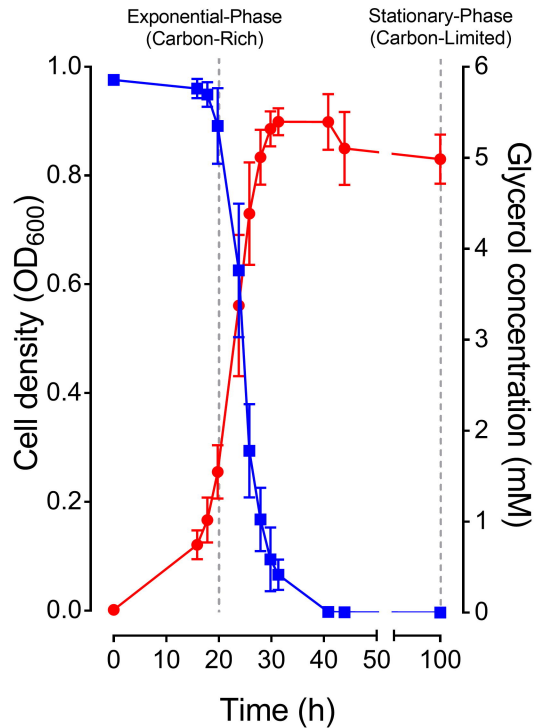

- Glycerol concentration (mM)
- Cell density (OD<sub>600</sub>)

**b**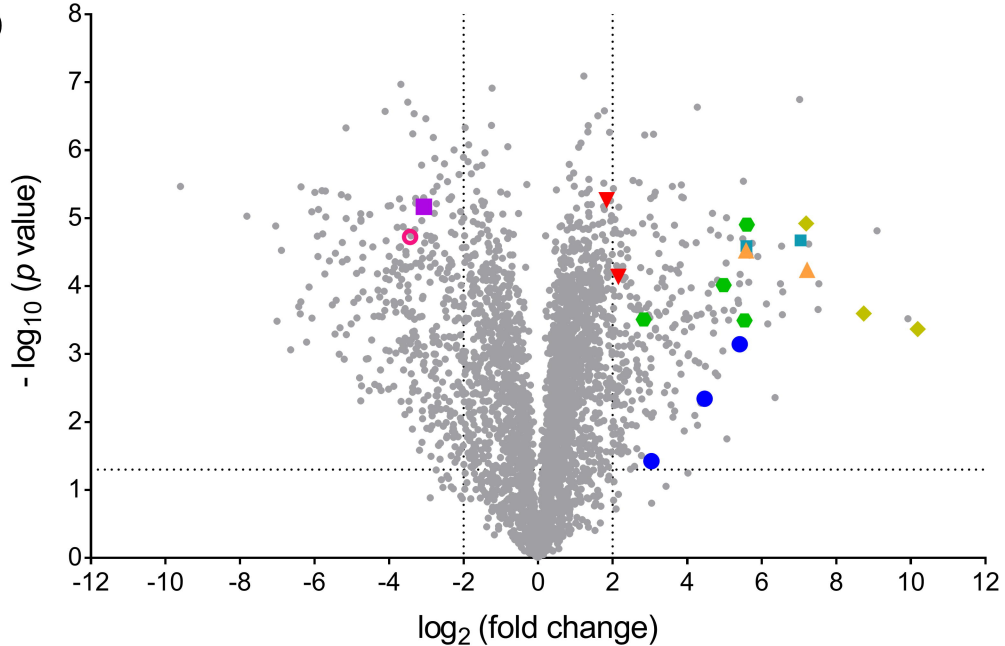

- Carbon monoxide dehydrogenase<sup>0744, 0746, 0749</sup>
- ▼ Hydrogenase-1<sup>2262, 2263</sup>
- ▲ Hydrogenase-2<sup>2719, 2720</sup>
- ◆ Branched-chain keto-acid dehydrogenase complex<sup>4710, 4711, 4712</sup>
- Proline dehydrogenase and 1-pyrroline-5-carboxylate dehydrogenase<sup>5117, 5119</sup>
- Acyl-CoA dehydrogenase<sup>2130, 2131, 2132, 2133</sup>
- Glycerol kinase<sup>6759</sup>
- Glycerol 3-phosphate dehydrogenase<sup>6761</sup>

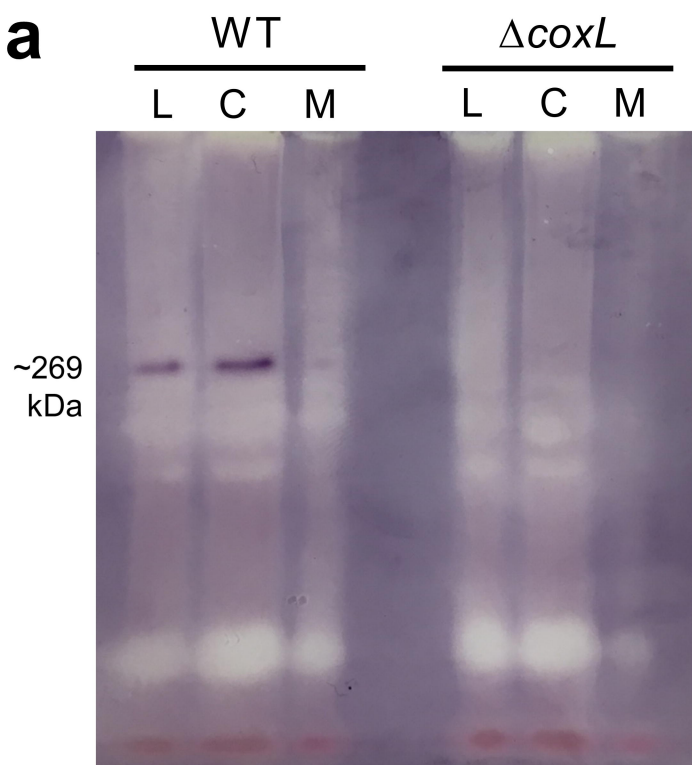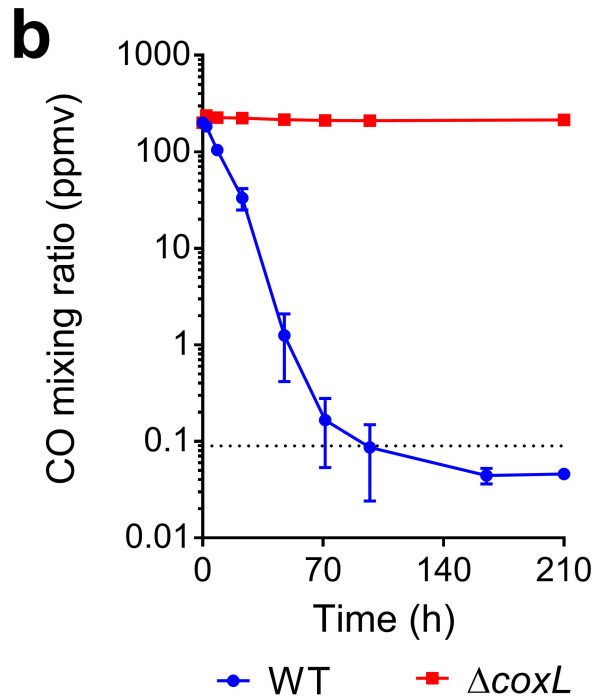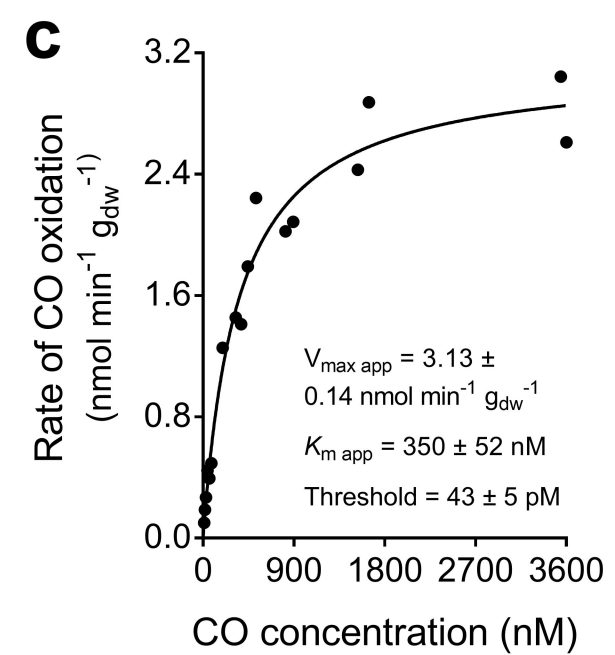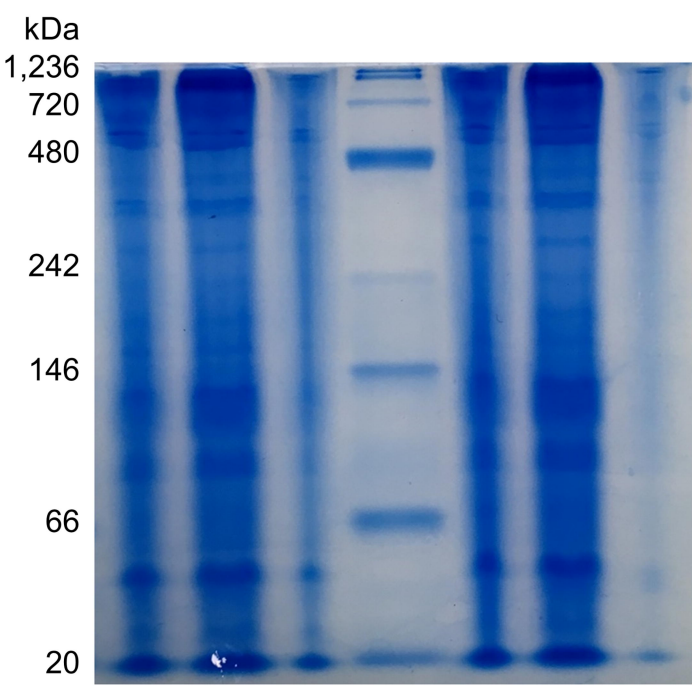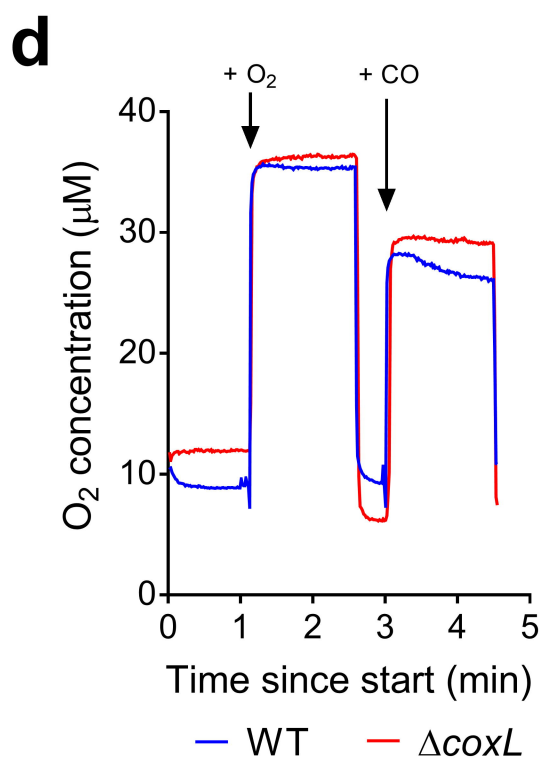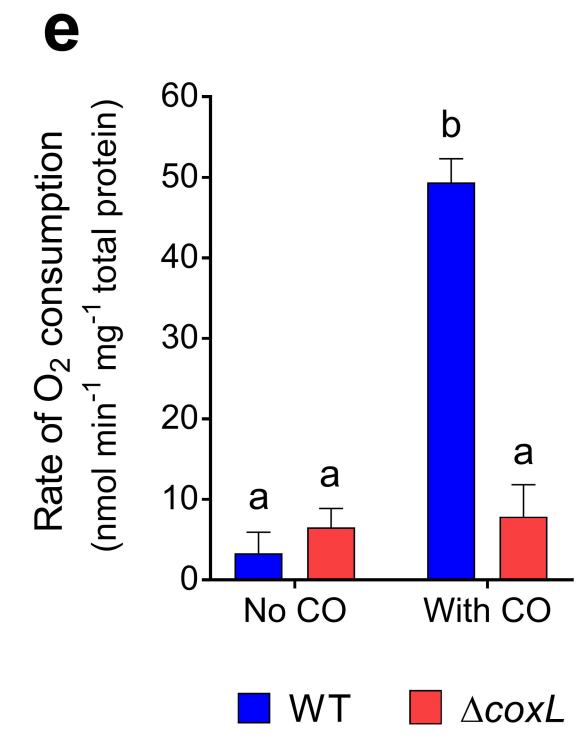

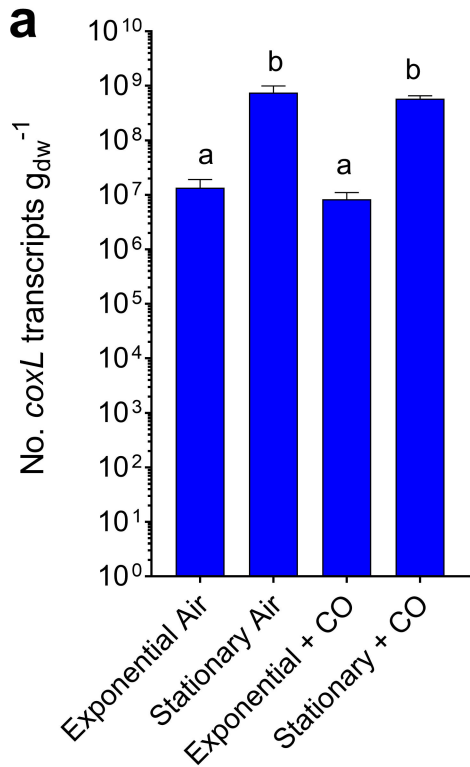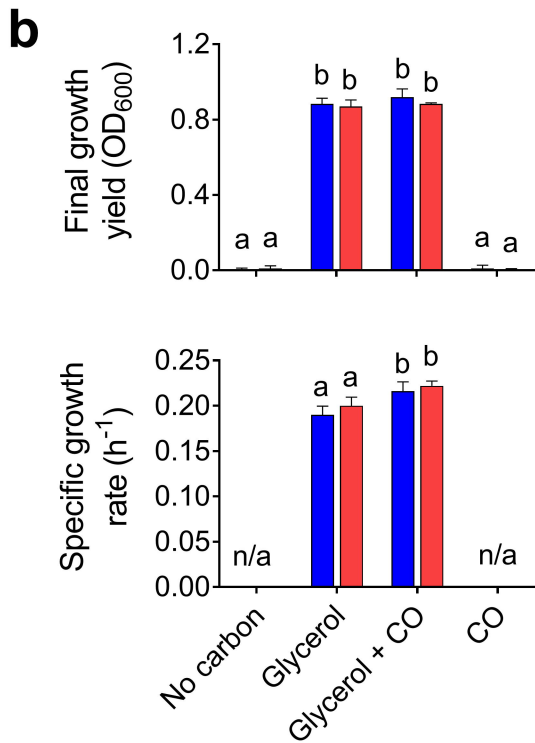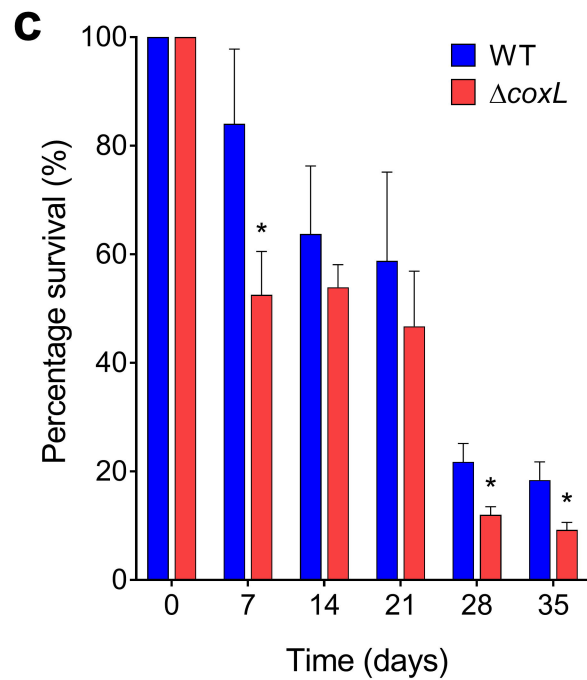

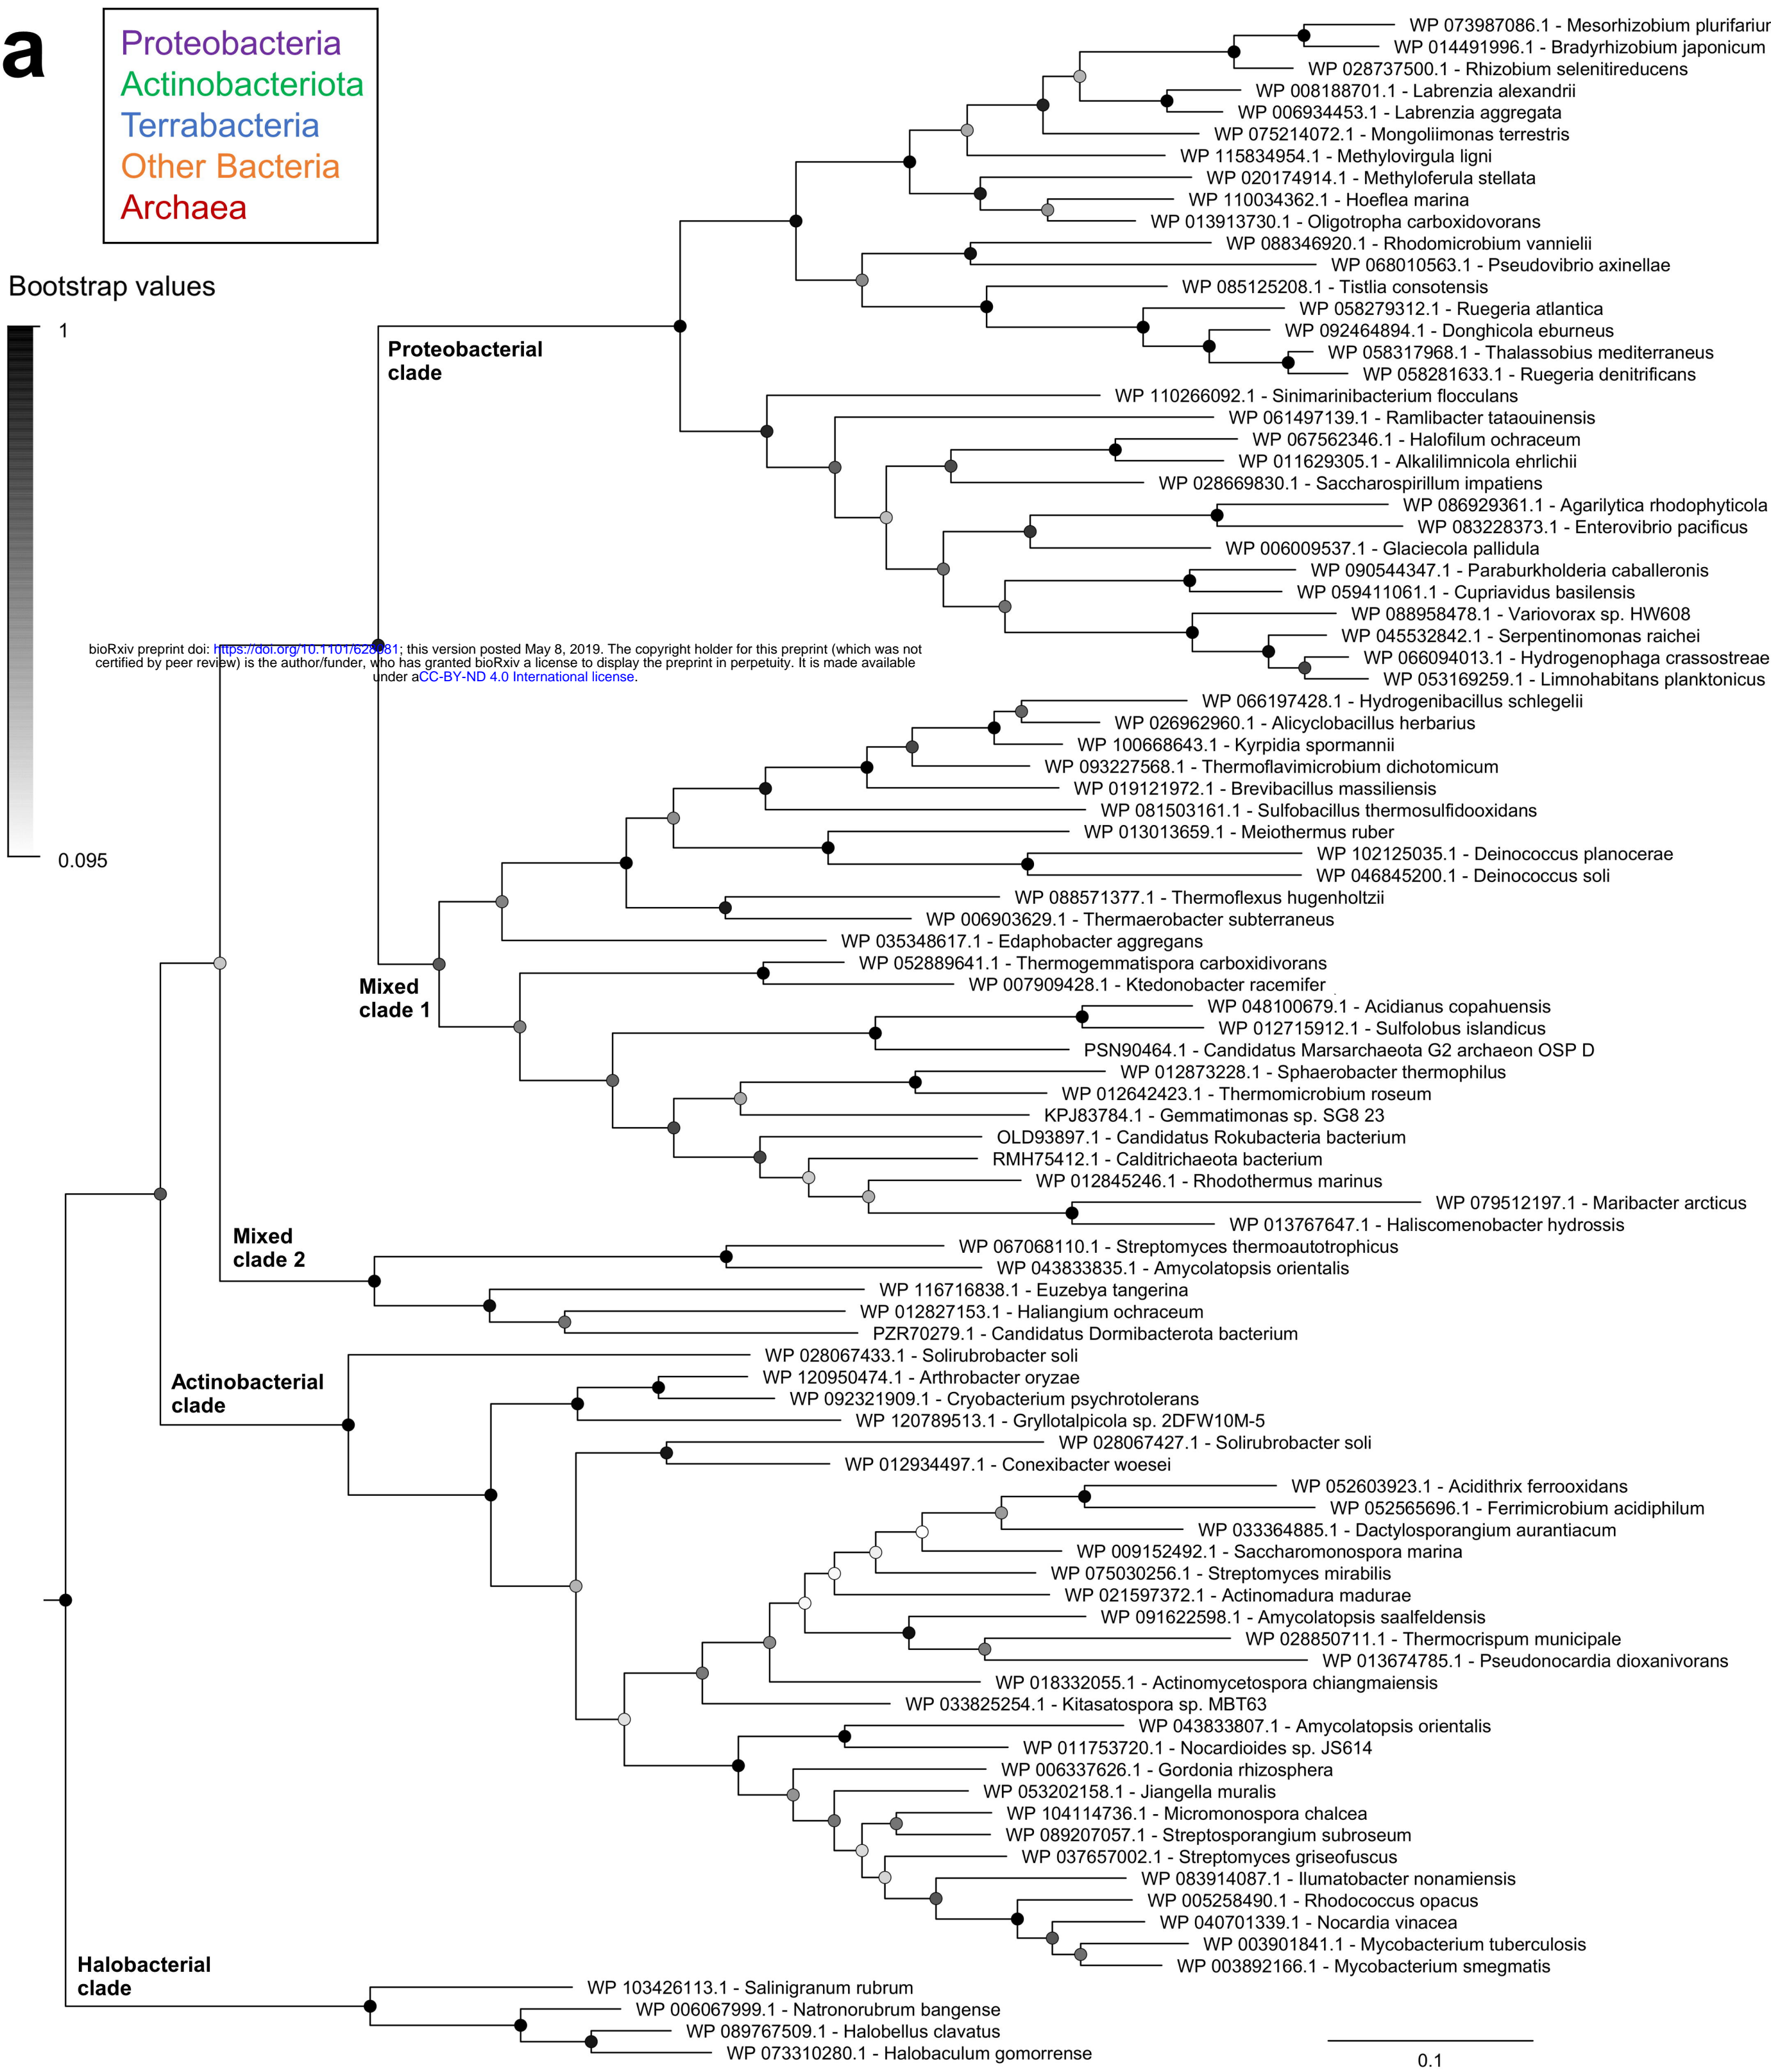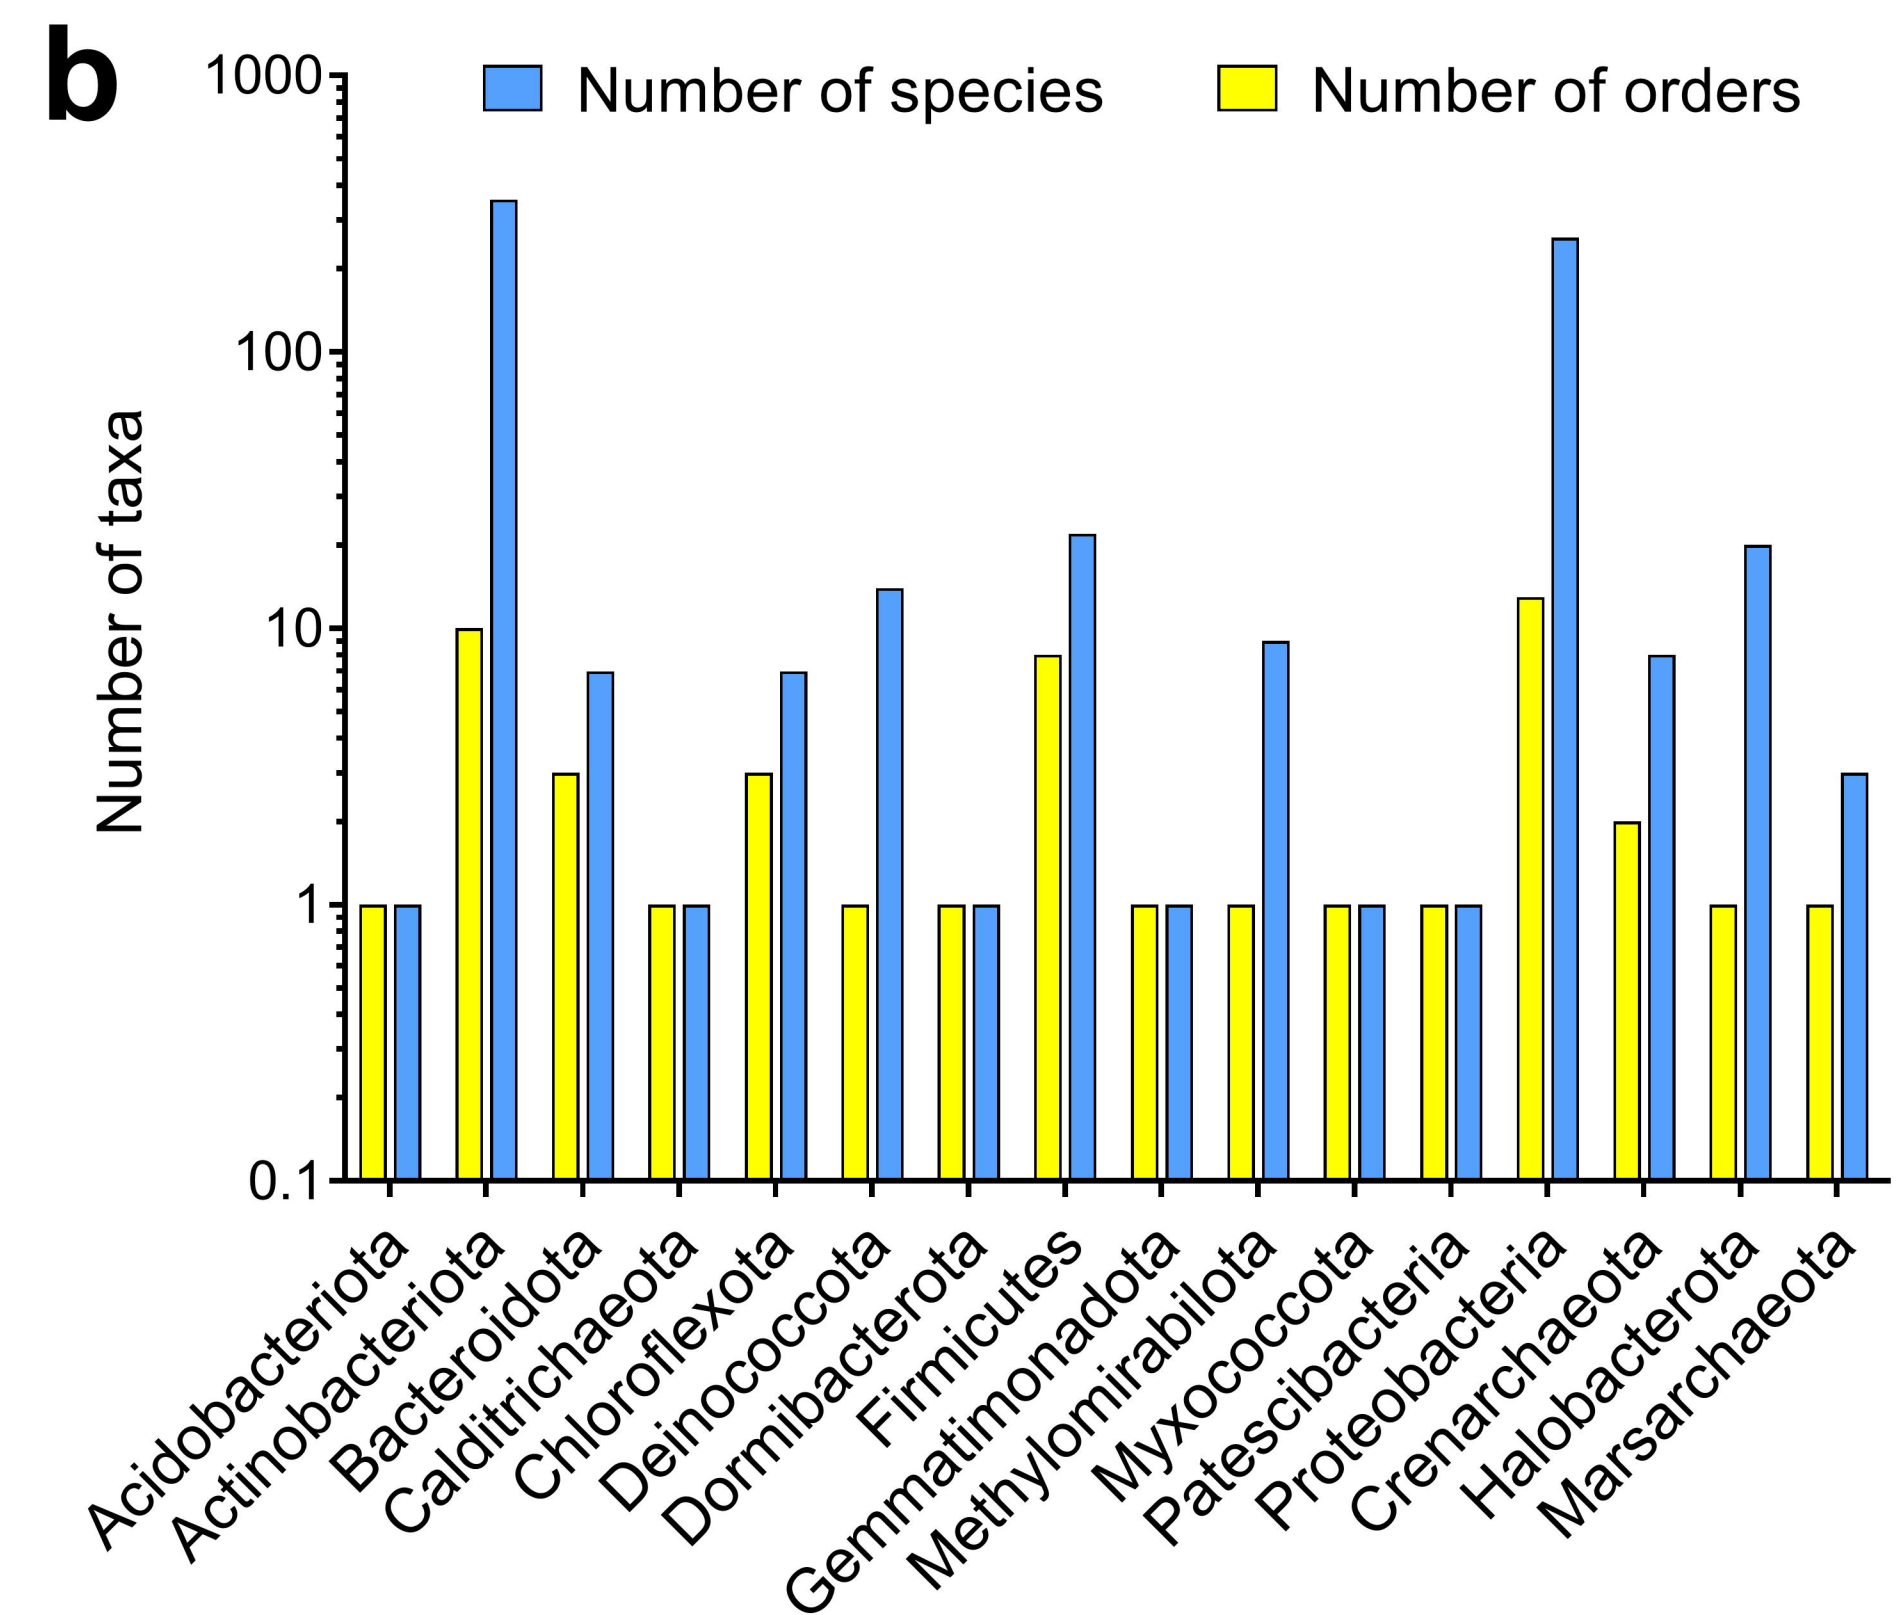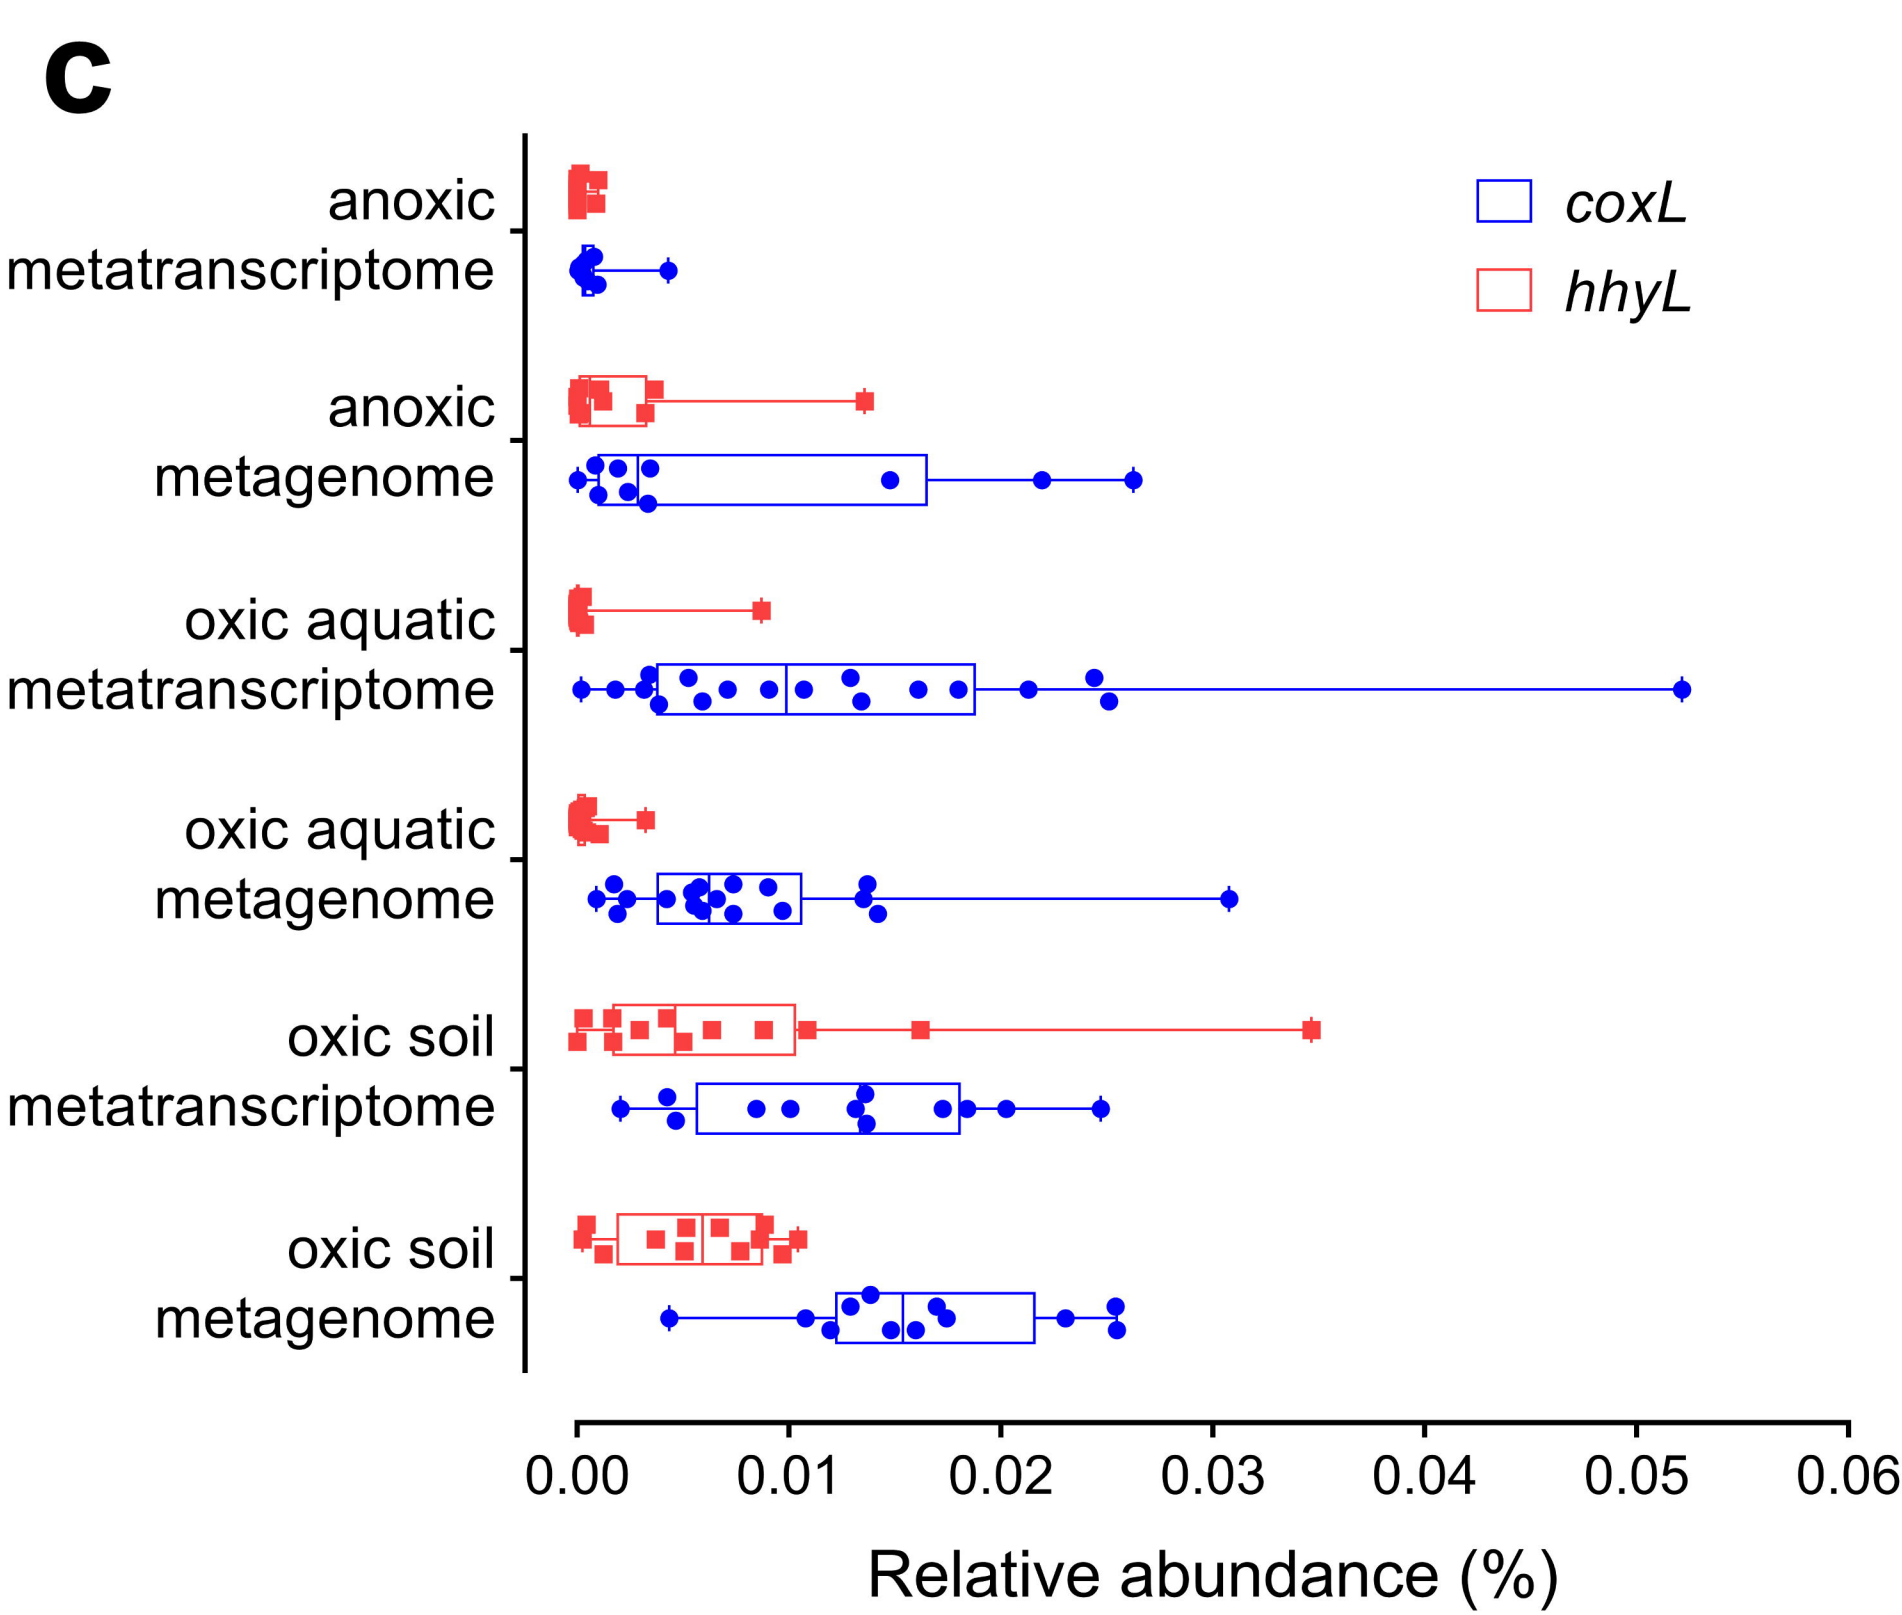

Source: https://www.biorxiv.org/content/10.1101/628081v2.full.pdf
